# Supplementary material for: Liquid Biopsies for Colorectal Cancer and Advanced Adenoma Screening and Surveillance: What to Measure?
Source: MDPI journal article supplement (doi:10.3390/cancers15184607), 2023-09-17
Supplement: s1 [file s1]

**Analysis of plasma cell-free DNA genome-wide  
methylation in patients with colorectal cancer and  
advanced adenoma**

Towards a cell-free DNA-based surveillance

Supplementary material

**Table S1** Patient characteristics of patients included for cell-free DNA analyses.

| ID       | Sex    | Location         | Treatment                                                             | Age at diagnosis | Reason colonoscopy         | Lesion | Characteristics <sup>†</sup>                                              | MSI status FFPE# |
|----------|--------|------------------|-----------------------------------------------------------------------|------------------|----------------------------|--------|---------------------------------------------------------------------------|------------------|
| CATCA001 | Male   | Sigmoid          | Laparoscopic sigmoid resection                                        | 57               | SP                         | CRC    | TxN0M0                                                                    | MSS              |
| CATCA006 | Female | Transverse colon | Endoscopic mucosal resection                                          | 66               | SP                         | AA     | Tubulovillous adenoma (n=3), one ≥10 mm and one with high-grade dysplasia | MSS              |
| CATCA008 | Female | Hepatic flexure  | Right hemicolectomy                                                   | 73               | SP                         | CRC    | pT2N0                                                                     | MSI-H            |
| CATCA016 | Male   | Sigmoid          | Neoadjuvant chemotherapy, sigmoid resection and wedge resection liver | 67               | SP                         | CRC    | T3NxM1                                                                    | MSS              |
| CATCA036 | Male   | Sigmoid          | Polypectomy                                                           | 65               | SP                         | AA     | ≥10 mm                                                                    | MSS              |
| CATCA038 | Female | Transverse colon | Polypectomy                                                           | 35               | Lynch carrier, <i>MSH2</i> | AA     | ≥10 mm                                                                    | MSI-H            |
| CATCA044 | Male   | Rectum           | Low-anterior resection                                                | 65               | SP                         | CRC    | pT3N2bM0                                                                  | MSS              |
| CATCA075 | Female | Sigmoid          | Polypectomy                                                           | 68               | SP                         | AA     | Tubulovillous adenoma, ≥10 mm                                             | MSS              |
| CATCA099 | Female | Sigmoid          | Polypectomy                                                           | 47               | Lynch carrier, <i>PMS2</i> | AA     | Tubulovillous adenoma, ≥10 mm                                             | MSS              |
| CATCA133 | Female | Rectum           | Polypectomy                                                           | 59               | SP                         | CRC    | pT1                                                                       | MSS              |

AA = advanced adenoma; CRC = colorectal cancer; SP = Dutch National Screening Program

**Figure S1** cfDNA CNV Wisecondor profile of patient CATCA016. This patient had colorectal cancer with liver metastases.

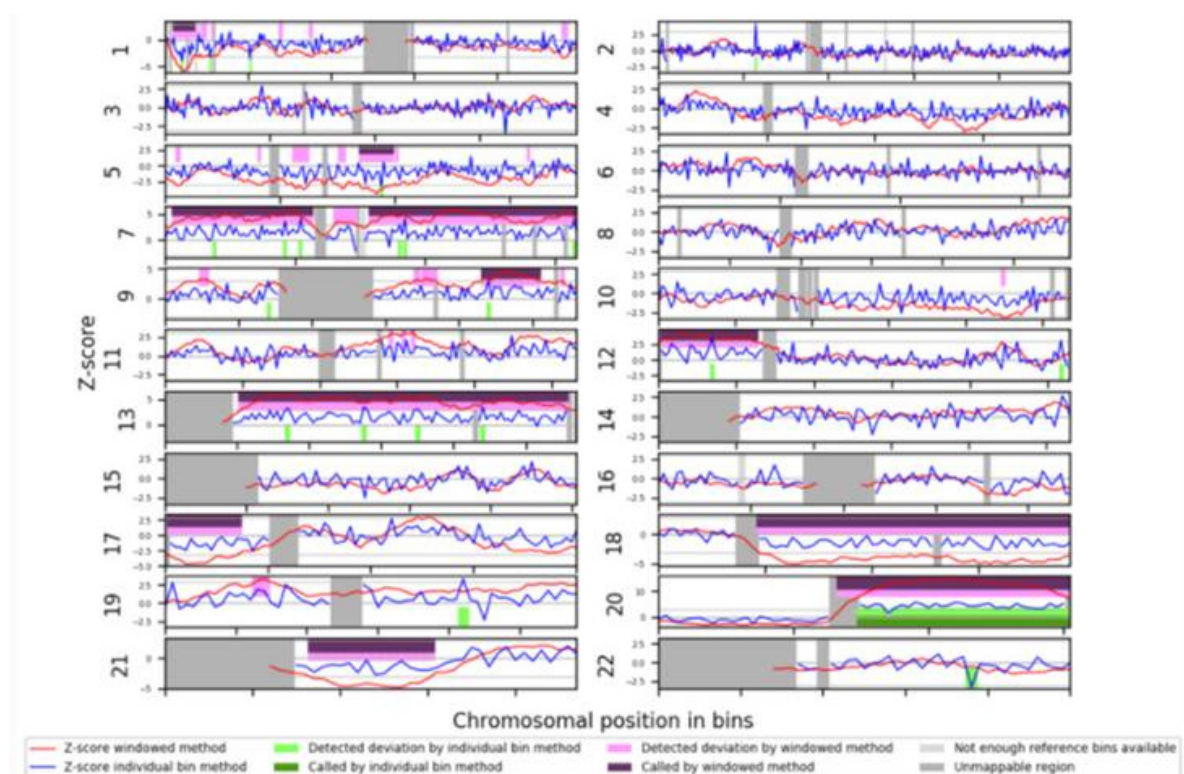

**Figure S2** A) Median insert sizes and B) quantile 5% insert sizes in cfDNA of patients with advanced adenoma (green), colorectal cancer (blue), and controls (red).

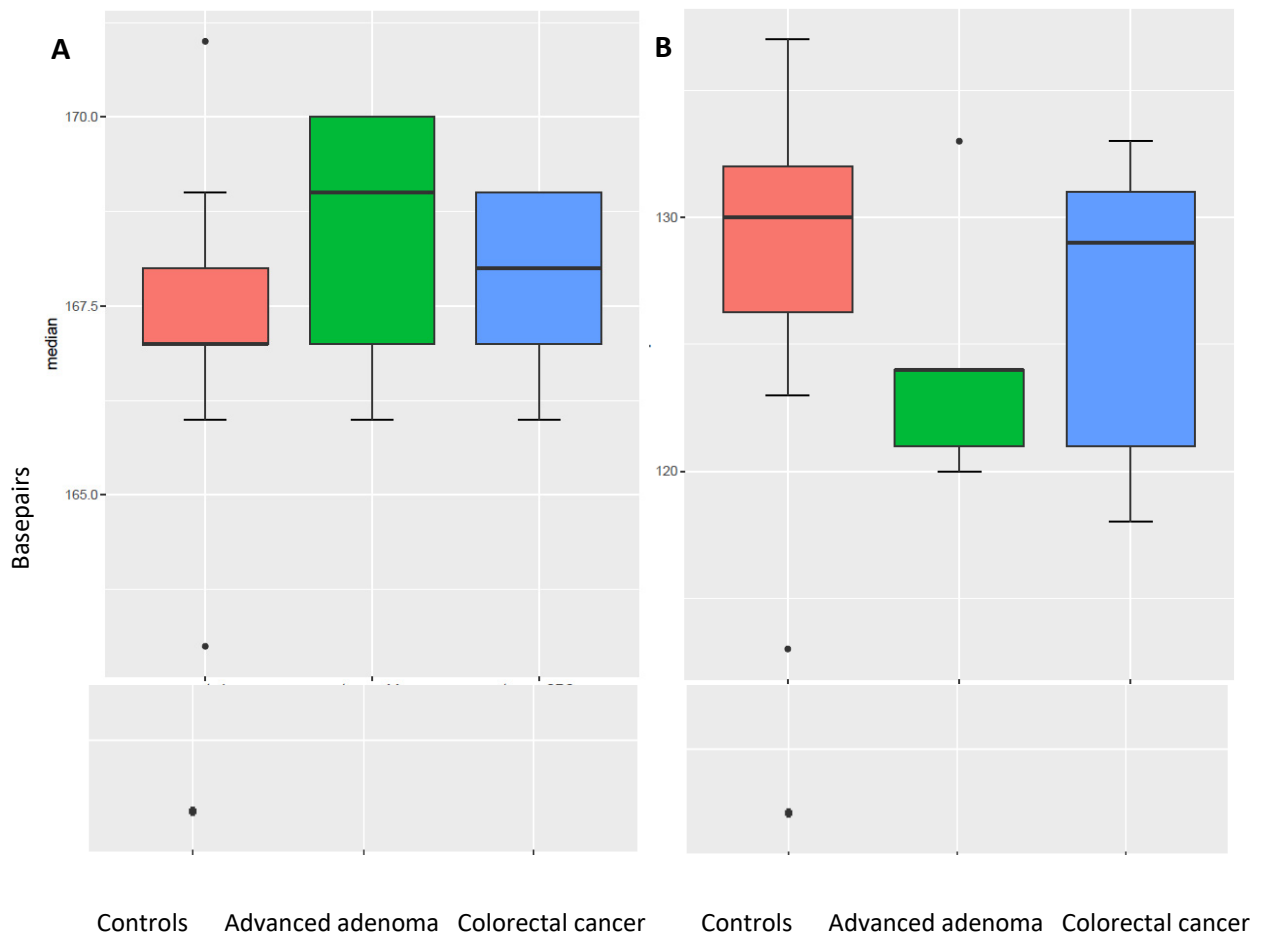

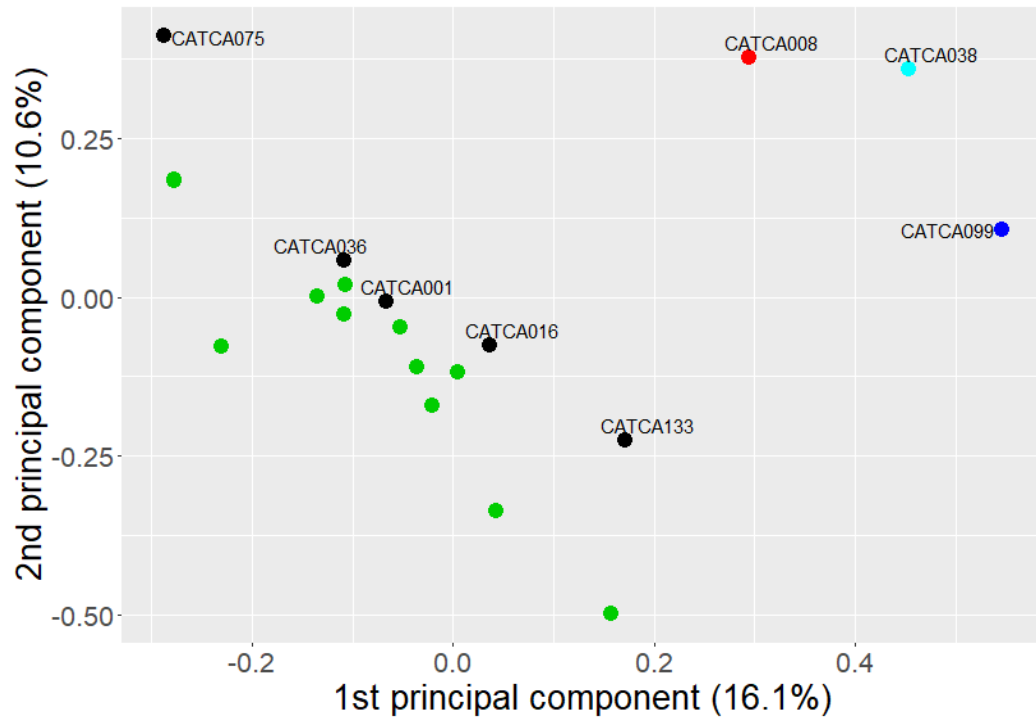

**Figure S3** Principal Component Analysis (PCA) of patient samples analysed with genome-wide methylation analysis (MeD-seq) for patients included in our study and healthy blood donors (HBDs, in green), with on X and Y axis the percentage of variation that can be explained by that specific principal component. The patient with MSI-H CRC and LS carriers with AA are depicted in red and blue, respectively, while the MSS lesions are shown in black.

**Table S3** Summary methylation scores upon genome-wide methylation analysis (MeD-seq), based on the entire genome (genome-wide summary score) or the 2798 differentially methylated regions (DMRs; DMR summary score) between patients and HBDs, for patients included in our study and healthy blood donors (HBDs). Genome-wide summary scores above 2.34 and DMR summary scores above 2.25 were considered elevated.

| Sample ID | Sample type                | Genome-wide summary score | DMR summary score |
|-----------|----------------------------|---------------------------|-------------------|
| HBD1      | Control                    | 0.67                      | 0.50              |
| HBD2      | Control                    | 0.22                      | 0.56              |
| HBD4      | Control                    | <b>2.52*</b>              | 1.88              |
| HBD5      | Control                    | -1.09                     | -1.53             |
| HBD7      | Control                    | 1.47                      | 1.37              |
| HBD19     | Control                    | -0.99                     | -1.02             |
| HBD20     | Control                    | -0.92                     | -0.49             |
| HBD21     | Control                    | -0.35                     | -0.51             |
| HBD22     | Control                    | 1.09                      | 1.61              |
| HBD24     | Control                    | -1.15                     | -1.10             |
| HBD25     | Control                    | -0.46                     | -0.40             |
| HBD29     | Control                    | -0.49                     | -0.61             |
| CATCA016  | CRC, MSS                   | -0.74                     | <b>2.62*</b>      |
| CATCA001  | CRC, MSS                   | -0.70                     | <b>2.62*</b>      |
| CATCA008  | CRC, MSI-H sporadic        | <b>17.42*</b>             | <b>582.50*</b>    |
| CATCA036  | AA, MSS                    | -0.31                     | <b>5.65*</b>      |
| CATCA038  | AA, Lynch syndrome         | <b>6.93*</b>              | <b>202.65*</b>    |
| CATCA075  | AA, MSS                    | 2.20                      | <b>18.57*</b>     |
| CATCA099  | AA, Lynch syndrome         | <b>18.78*</b>             | <b>623.80*</b>    |
| CATCA133  | CRC, MSS                   | -0.98                     | 1.29              |
|           | <b>95% CI HBDs cut-off</b> | 2.34                      | 2.25              |

\*Depicts elevated scores.
