# Supplementary material for: Liquid Biopsies for Colorectal Cancer and Advanced Adenoma Screening and Surveillance: What to Measure?
Source: Cancers (Basel). 2023 Sep 17;15(18):4607. doi: 10.3390/cancers15184607 (PMC10526371; doi:10.3390/cancers15184607)
Supplement: Supplementary file 1 [file cancers-15-04607-s001.zip › Table S2 DMRs.xlsx]

## Sheet: Sheet1
	gene_ID	Ensembl_ID	direction
chr18_48563795_48565795	RP11-426J5.3	ENSG00000278983	hypomethylated
chr1_229884752_229886752	RP11-286M16.1	ENSG00000227043	hypermethylated
chr11_118400154_118402154	ATP5L	ENSG00000167283	hypermethylated
chr9_32632454_32634454	RP11-555J4.4	ENSG00000223440	hypomethylated
chr4_25503997_25505997	RP11-206P5.2	ENSG00000248608	hypomethylated
chr16_31712229_31714229	ZNF720	ENSG00000197302	hypermethylated
chr11_118400895_118402895	RP11-770J1.5	ENSG00000254873	hypermethylated
chr8_55772142_55774142	TGS1	ENSG00000137574	hypermethylated
chr8_55772407_55774407	TMEM68	ENSG00000167904	hypermethylated
chr21_44550505_44552505	KRTAP10-2	ENSG00000205445	hypomethylated
chr5_17633460_17635460	RP11-432M8.13	ENSG00000250782	hypomethylated
chr22_36561915_36563915	RP5-1119A7.17	ENSG00000261675	hypermethylated
chr4_165006959_165008959	RP11-366M4.13	ENSG00000250887	hypomethylated
chr17_4787959_4789959	GLTPD2	ENSG00000182327	hypomethylated
chr3_187367332_187369332	RTP4	ENSG00000136514	hypermethylated
chr19_39203266_39205266	SYCN	ENSG00000179751	hypomethylated
chr17_15731247_15733247	TBC1D26	ENSG00000214946	hypomethylated
chr2_87824952_87826952	RGPD2	ENSG00000185304	hypomethylated
chr16_31710984_31712984	CTD-2358C21.4	ENSG00000261731	hypermethylated
chr16_33495093_33497093	RP11-23E10.5	ENSG00000262090	hypomethylated
chr22_42776296_42778296	RPL5P34	ENSG00000234009	hypermethylated
chr1_112889922_112891922	RP3-522D1.2	ENSG00000228040	hypermethylated
chr11_67309006_67311006	AP001885.1	ENSG00000275200	hypomethylated
chr11_130671956_130673956	C11orf44	ENSG00000175728	hypermethylated
chr19_41505152_41507152	AC005795.1	ENSG00000268034	hypomethylated
chr1_37775670_37777670	ACTN4P2	ENSG00000214141	hypomethylated
chr11_47448178_47450178	RAPSN	ENSG00000165917	hypomethylated
chr7_117019211_117021211	MIR6132	ENSG00000275870	hypermethylated
chr7_1837586_1839586	AC110781.3	ENSG00000176349	hypomethylated
chr6_127265610_127267610	RNF146	ENSG00000118518	hypermethylated
chr15_28364731_28366731	RP11-483E23.3	ENSG00000261497	hypomethylated
chr15_20281744_20283744	CHEK2P2	ENSG00000259156	hypermethylated
chr19_53425499_53427499	CTD-2224J9.7	ENSG00000249435	hypomethylated
chr2_113656908_113658908	RP11-395L14.17	ENSG00000144158	hypermethylated
chr7_157009805_157011805	MNX1-AS1	ENSG00000243479	hypermethylated
chr9_136936988_136938988	RP11-229P13.25	ENSG00000260190	hypomethylated
chr17_44903546_44905546	AC015936.3	ENSG00000224911	hypomethylated
chr12_94589821_94591821	LSM3P2	ENSG00000257847	hypomethylated
chr12_12451481_12453481	RP11-253I19.4	ENSG00000271370	hypermethylated
chr11_62536312_62538312	RP11-864I4.3	ENSG00000250659	hypomethylated
chr12_54472602_54474602	GTSF1	ENSG00000170627	hypomethylated
chr16_29820252_29822252	AC009133.12	ENSG00000238045	hypomethylated
chr13_85362601_85364601	LINC00351	ENSG00000226317	hypomethylated
chr9_97410950_97412950	TDRD7	ENSG00000196116	hypermethylated
chr3_184334926_184336926	FAM131A	ENSG00000175182	hypermethylated
chr11_65088375_65090375	TMEM262	ENSG00000187066	hypomethylated
chr17_81329674_81331674	TMEM105	ENSG00000185332	hypermethylated
chr20_324401_326401	SOX12	ENSG00000177732	hypermethylated
chr9_137549534_137551534	PNPLA7	ENSG00000130653	hypermethylated
chr19_40575851_40577851	SHKBP1	ENSG00000160410	hypomethylated
chr20_62426827_62428827	RP5-908M14.5	ENSG00000233017	hypomethylated
chr15_25177738_25179738	SNORD115-5	ENSG00000200503	hypomethylated
chr19_55653146_55655146	U2AF2	ENSG00000063244	hypomethylated
chr13_112587167_112589167	TUBGCP3	ENSG00000126216	hypermethylated
chr1_37033129_37035129	GRIK3	ENSG00000163873	hypermethylated
chr1_44117850_44119850	KLF17	ENSG00000171872	hypomethylated
chr2_87823942_87825942	MTATP8P2	ENSG00000229604	hypomethylated
chr7_150823627_150825627	AOC1	ENSG00000002726	hypomethylated
chr6_12513110_12515110	RPL15P3	ENSG00000212802	hypomethylated
chr4_188159065_188161065	RP11-366H4.1	ENSG00000248370	hypermethylated
chr1_227727539_227729539	SNAP47	ENSG00000143740	hypermethylated
chr1_247840896_247842896	OR11L1	ENSG00000197591	hypomethylated
chr1_91948371_91950371	BRDT	ENSG00000137948	hypomethylated
chr15_51621833_51623833	DMXL2	ENSG00000104093	hypermethylated
chr1_56644301_56646301	PPAP2B	ENSG00000162407	hypermethylated
chr1_56644322_56646322	PRKAA2	ENSG00000162409	hypermethylated
chr16_86088526_86090526	RP11-805I24.1	ENSG00000261177	hypomethylated
chr21_44653659_44655659	KRTAP12-4	ENSG00000212933	hypomethylated
chr4_3503457_3505457	RP11-529E10.6	ENSG00000261643	hypomethylated
chr14_19199279_19201279	RP11-496I2.7	ENSG00000271632	hypermethylated
chr16_88099985_88101985	RP11-863P13.4	ENSG00000205037	hypomethylated
chr22_49850425_49852425	RP11-494O16.4	ENSG00000279494	hypomethylated
chr2_216631828_216633828	IGFBP2	ENSG00000115457	hypermethylated
chr12_6555083_6557083	IFFO1	ENSG00000010295	hypomethylated
chr7_26397593_26399593	AC004540.5	ENSG00000214870	hypermethylated
chr1_26471450_26473450	HMGN2	ENSG00000198830	hypermethylated
chr16_60356214_60358214	RP11-457D20.1	ENSG00000261590	hypermethylated
chr5_176198295_176200295	RP11-844P9.2	ENSG00000248596	hypermethylated
chr9_131521229_131523229	RP11-334J6.6	ENSG00000230289	hypermethylated
chr3_9215895_9217895	SRGAP3-AS3	ENSG00000227929	hypomethylated
chr1_5990466_5992466	KCNAB2	ENSG00000069424	hypermethylated
chr2_221636543_221638543	AC068489.1	ENSG00000234446	hypomethylated
chr17_50943713_50945713	RP11-700H6.1	ENSG00000247011	hypermethylated
chr15_58455188_58457188	RP11-355N15.2	ENSG00000277790	hypomethylated
chr1_197221222_197223222	RP11-332L8.1	ENSG00000237861	hypermethylated
chr15_36612474_36614474	RP11-618N24.1	ENSG00000261635	hypomethylated
chr12_95550490_95552490	USP44	ENSG00000136014	hypomethylated
chr12_95550582_95552582	PGAM1P5	ENSG00000257150	hypomethylated
chr13_52599042_52601042	RP11-78J21.7	ENSG00000273784	hypomethylated
chr18_47852457_47854457	RP11-380M21.2	ENSG00000267541	hypomethylated
chr14_103373916_103375916	RP11-600F24.1	ENSG00000243904	hypomethylated
chr2_128518177_128520177	ISCA1P6	ENSG00000227653	hypomethylated
chr2_201139027_201141027	IMPDH1P10	ENSG00000232133	hypermethylated
chr1_632696_634696	MTATP6P1	ENSG00000248527	hypomethylated
chr5_172655713_172657713	CTB-79E8.3	ENSG00000253683	hypomethylated
chr1_633376_635376	RP5-857K21.11	ENSG00000198744	hypomethylated
chr14_101028611_101030611	MIR494	ENSG00000194717	hypomethylated
chr1_632535_634535	MTATP8P1	ENSG00000240409	hypomethylated
chr1_628062_630062	MTND1P23	ENSG00000225972	hypomethylated
chr6_126642488_126644488	PRELID1P1	ENSG00000217325	hypomethylated
chr1_629896_631896	AC114498.1	ENSG00000276171	hypomethylated
chr11_50306681_50308681	RP11-574M7.1	ENSG00000254840	hypermethylated
chr5_97182260_97184260	RIOK2	ENSG00000058729	hypermethylated
chr11_133809376_133811376	RP11-448P19.1	ENSG00000255258	hypomethylated
chr4_54656918_54658918	KIT	ENSG00000157404	hypermethylated
chr1_628640_630640	MTND2P28	ENSG00000225630	hypomethylated
chr19_2248309_2250309	AMH	ENSG00000104899	hypomethylated
chr9_135500734_135502734	C9orf116	ENSG00000160345	hypermethylated
chr19_4830704_4832704	TICAM1	ENSG00000127666	hypermethylated
chr1_630074_632074	RP5-857K21.6	ENSG00000237973	hypomethylated
chr1_631757_633757	RP5-857K21.7	ENSG00000229344	hypomethylated
chr1_628010_630010	RP5-857K21.5	ENSG00000223659	hypomethylated
chr9_137788235_137790235	RP11-188C12.2	ENSG00000255585	hypomethylated
chr19_1001757_1003757	LLNLR-284B4.2	ENSG00000266990	hypermethylated
chr1_68042330_68044330	RP4-609E1.2	ENSG00000235055	hypomethylated
chr3_195910945_195912945	TNK2	ENSG00000061938	hypomethylated
chr7_27151561_27153561	RP1-170O19.22	ENSG00000273433	hypermethylated
chr7_27151581_27153581	HOXA3	ENSG00000105997	hypermethylated
chr7_27151598_27153598	RP1-170O19.23	ENSG00000272801	hypermethylated
chr12_122980649_122982649	ABCB9	ENSG00000150967	hypomethylated
chr5_1724149_1726149	CTD-2587M23.1	ENSG00000260066	hypomethylated
chr17_28274716_28276716	CTD-2008P7.5	ENSG00000264029	hypermethylated
chr17_28265369_28267369	CTD-2008P7.1	ENSG00000260777	hypomethylated
chr7_157009651_157011651	MNX1	ENSG00000130675	hypermethylated
chr17_39625740_39627740	PPP1R1B	ENSG00000131771	hypermethylated
chr11_64118210_64120210	RP11-21A7A.3	ENSG00000256341	hypermethylated
chr5_134923123_134925123	MTND6P4	ENSG00000249119	hypomethylated
chr3_14947424_14949424	FGD5-AS1	ENSG00000225733	hypermethylated
chr1_631413_633413	MIR6723	ENSG00000278791	hypomethylated
chr11_5515705_5517705	UBQLNL	ENSG00000175518	hypermethylated
chr20_57392062_57394062	RP4-800J21.3	ENSG00000218018	hypomethylated
chr16_75432485_75434485	CFDP1	ENSG00000153774	hypermethylated
chr3_96617236_96619236	MTRNR2L12	ENSG00000269028	hypomethylated
chr17_48556262_48558262	HOXB-AS2	ENSG00000239552	hypomethylated
chr17_50364232_50366232	RP11-893F2.18	ENSG00000279792	hypermethylated
chr1_204276005_204278005	RP11-203F10.5	ENSG00000231691	hypomethylated
chr2_33727207_33729207	MYADML	ENSG00000239649	hypomethylated
chr15_22450209_22452209	RP11-566K19.12	ENSG00000275363	hypomethylated
chr5_12793731_12795731	RP11-419C19.3	ENSG00000251112	hypomethylated
chr5_36875759_36877759	NIPBL	ENSG00000164190	hypermethylated
chr20_46170237_46172237	RP5-998H6.2	ENSG00000229957	hypermethylated
chr11_1500247_1502247	MOB2	ENSG00000182208	hypomethylated
chr5_134923049_134925049	CTB-36O1.7	ENSG00000244921	hypomethylated
chr9_34317407_34319407	SERPINH1P1	ENSG00000229207	hypomethylated
chr14_100873495_100875495	MIR337	ENSG00000199151	hypermethylated
chr19_4357448_4359448	AC007292.3	ENSG00000269318	hypermethylated
chr1_67053099_67055099	SLC35D1	ENSG00000116704	hypermethylated
chr8_30657251_30659251	GTF2E2	ENSG00000197265	hypermethylated
chr5_82278462_82280462	ATP6AP1L	ENSG00000205464	hypermethylated
chr2_112852328_112854328	AC079753.4	ENSG00000180152	hypomethylated
chr11_70202163_70204163	FADD	ENSG00000168040	hypermethylated
chr13_52599119_52601119	MRPS31P4	ENSG00000250299	hypomethylated
chr17_76026452_76028452	EVPL	ENSG00000167880	hypermethylated
chr8_1247760_1249760	CTD-2281E23.3	ENSG00000254160	hypomethylated
chr8_25183723_25185723	DOCK5	ENSG00000147459	hypermethylated
chr14_55579110_55581110	KTN1-AS1	ENSG00000186615	hypermethylated
chr20_23131621_23133621	LINC00656	ENSG00000233746	hypermethylated
chr22_32140267_32142267	RP1-127L4.7	ENSG00000239674	hypermethylated
chr10_91907131_91909131	RP11-402D21.2	ENSG00000272817	hypomethylated
chr16_29612640_29614640	SLC7A5P1	ENSG00000260727	hypomethylated
chr17_28225563_28227563	PYY2	ENSG00000237575	hypomethylated
chr9_73475073_73477073	DPP3P2	ENSG00000221844	hypomethylated
chr14_101029041_101031041	MIR1193	ENSG00000221036	hypomethylated
chr11_66712009_66714009	RN7SL12P	ENSG00000239553	hypomethylated
chr22_49737677_49739677	RN7SKP252	ENSG00000223142	hypomethylated
chr19_20294089_20296089	AC078899.3	ENSG00000269274	hypomethylated
chr14_23407277_23409277	MYH6	ENSG00000197616	hypomethylated
chr20_57350010_57352010	RAE1	ENSG00000101146	hypermethylated
chr2_97712560_97714560	ZAP70	ENSG00000115085	hypomethylated
chr19_23074201_23076201	CTD-2291D10.4	ENSG00000267886	hypermethylated
chr19_23074210_23076210	ZNF730	ENSG00000183850	hypermethylated
chr12_53158586_53160586	RP11-1136G11.8	ENSG00000257808	hypomethylated
chr17_30829901_30831901	CTD-2349P21.1	ENSG00000242439	hypermethylated
chr6_99423922_99425922	RP11-98I9.4	ENSG00000228506	hypermethylated
chr17_4996610_4998610	INCA1	ENSG00000196388	hypomethylated
chr15_20548444_20550444	RP11-467L19.6	ENSG00000258797	hypomethylated
chr15_52803942_52805942	RP11-209K10.2	ENSG00000259203	hypermethylated
chr10_5364009_5366009	UCN3	ENSG00000178473	hypomethylated
chr5_100047785_100049785	MTND5P10	ENSG00000271687	hypomethylated
chr20_62426533_62428533	RBBP8NL	ENSG00000130701	hypomethylated
chr16_6572767_6574767	RP11-468I15.1	ENSG00000260835	hypomethylated
chr12_63778803_63780803	TMEM5	ENSG00000118600	hypermethylated
chr10_16277701_16279701	RP11-461K13.1	ENSG00000226140	hypermethylated
chr9_33351874_33353874	Y_RNA	ENSG00000200544	hypomethylated
chr10_113718332_113720332	RP11-211N11.5	ENSG00000234393	hypomethylated
chr19_35261846_35263846	AD000684.2	ENSG00000268947	hypomethylated
chr3_197644669_197646669	RP11-496H1.2	ENSG00000273308	hypomethylated
chr14_105587395_105589395	IGHA2	ENSG00000211890	hypermethylated
chr13_24511810_24513810	PARP4	ENSG00000102699	hypermethylated
chr22_49852842_49854842	ZBED4	ENSG00000100426	hypermethylated
chr14_103281933_103283933	RP11-45P15.2	ENSG00000240624	hypomethylated
chr8_67061426_67063426	CSPP1	ENSG00000104218	hypermethylated
chr14_100880883_100882883	MIR433	ENSG00000207569	hypomethylated
chr6_7388496_7390496	RIOK1	ENSG00000124784	hypermethylated
chr6_7388743_7390743	CAGE1	ENSG00000164304	hypermethylated
chr7_5071125_5073125	RBAKDN	ENSG00000273313	hypomethylated
chr21_32611281_32613281	AP000275.65	ENSG00000265590	hypermethylated
chr17_13600927_13602927	HS3ST3A1	ENSG00000153976	hypermethylated
chr3_195911049_195913049	AC124944.3	ENSG00000226155	hypomethylated
chr16_688001_690001	LA16c-313D11.12	ENSG00000261659	hypomethylated
chr1_1672275_1674275	RP11-345P4.6	ENSG00000269227	hypomethylated
chr9_124776158_124778158	OLFML2A	ENSG00000185585	hypomethylated
chr11_64184272_64186272	STIP1	ENSG00000168439	hypermethylated
chr8_42895932_42897932	HOOK3	ENSG00000168172	hypermethylated
chr18_74456944_74458944	FAM69C	ENSG00000187773	hypomethylated
chr2_205763006_205765006	AC007362.3	ENSG00000225216	hypermethylated
chr3_179463346_179465346	MTHFD2P7	ENSG00000181260	hypomethylated
chr1_7388754_7390754	RP3-453P22.2	ENSG00000237728	hypomethylated
chr8_144501973_144503973	GPT	ENSG00000167701	hypermethylated
chr14_101968601_101970601	RP11-1017G21.3	ENSG00000259013	hypomethylated
chr16_75432836_75434836	RP11-77K12.9	ENSG00000274220	hypermethylated
chr10_8297897_8299897	RP5-1119O21.2	ENSG00000226861	hypomethylated
chr3_136196241_136198241	MSL2	ENSG00000174579	hypermethylated
chr9_99818889_99820889	RP11-554F20.1	ENSG00000237461	hypermethylated
chr2_10910937_10912937	KCNF1	ENSG00000162975	hypomethylated
chr17_43167249_43169249	RP11-242D8.2	ENSG00000267595	hypomethylated
chr9_107115829_107117829	RP11-196I18.3	ENSG00000225531	hypermethylated
chr16_2576373_2578373	RP11-20I23.5	ENSG00000279568	hypomethylated
chr14_59464342_59466342	GPR135	ENSG00000181619	hypermethylated
chr1_165355715_165357715	LMX1A	ENSG00000162761	hypermethylated
chr9_32525324_32527324	DDX58	ENSG00000107201	hypermethylated
chr17_53104734_53106734	RP11-750B16.1	ENSG00000262902	hypomethylated
chr17_53105157_53107157	AC091154.1	ENSG00000276078	hypomethylated
chr6_135258996_135260996	RP1-32B1.4	ENSG00000224374	hypomethylated
chr9_72007136_72009136	HSPB1P1	ENSG00000236060	hypomethylated
chr8_23335171_23337171	RP11-177H13.2	ENSG00000253837	hypomethylated
chr18_51158383_51160383	SRSF10P1	ENSG00000267717	hypermethylated
chr17_9644325_9646325	RP11-55L4.2	ENSG00000265349	hypermethylated
chr18_70204945_70206945	RTTN	ENSG00000176225	hypermethylated
chr18_12748421_12750421	RP11-973H7.4	ENSG00000267654	hypermethylated
chr1_209431133_209433133	MIR205	ENSG00000276335	hypermethylated
chr2_233866359_233868359	AC005538.3	ENSG00000279809	hypermethylated
chr3_126433569_126435569	RP11-203H19.2	ENSG00000279328	hypomethylated
chr7_158590616_158592616	MIR5707	ENSG00000265598	hypermethylated
chr17_38913979_38915979	MIR6779	ENSG00000277057	hypomethylated
chr2_30676762_30678762	RP11-523J2.1	ENSG00000278908	hypomethylated
chr6_37169203_37171203	PIM1	ENSG00000137193	hypermethylated
chr2_18582468_18584468	RNU6-1215P	ENSG00000207170	hypomethylated
chr2_223050814_223052814	KCNE4	ENSG00000152049	hypomethylated
chr3_49683983_49685983	AC099668.5	ENSG00000259970	hypermethylated
chr8_42896290_42898290	RNF170	ENSG00000120925	hypermethylated
chr11_65635310_65637310	MIR4690	ENSG00000266041	hypomethylated
chr17_13908231_13910231	RP11-131K5.2	ENSG00000265494	hypermethylated
chr14_88823153_88825153	TTC8	ENSG00000165533	hypermethylated
chr6_33898135_33900135	MIR7159	ENSG00000276824	hypomethylated
chr1_16872708_16874708	U1	ENSG00000277234	hypomethylated
chr12_2739093_2741093	RP11-986G18.2	ENSG00000274659	hypomethylated
chr19_46136547_46138547	TGIF1P1	ENSG00000259339	hypermethylated
chr2_64452969_64454969	LGALSL	ENSG00000119862	hypomethylated
chr3_75905695_75907695	ROBO2	ENSG00000185008	hypermethylated
chr17_31829731_31831731	CTC-542B22.1	ENSG00000265046	hypomethylated
chr10_78266328_78268328	LINC00595	ENSG00000227136	hypermethylated
chr20_23988292_23990292	POM121L3P	ENSG00000167390	hypomethylated
chr22_21651981_21653981	MIR301B	ENSG00000212102	hypomethylated
chr5_16464792_16466792	ZNF622	ENSG00000173545	hypermethylated
chr16_67979829_67981829	DPEP3	ENSG00000141096	hypomethylated
chr13_96947018_96949018	RP11-65L19.4	ENSG00000272329	hypomethylated
chr5_176387747_176389747	HIGD2A	ENSG00000146066	hypomethylated
chr5_133426706_133428706	MIR1289-2	ENSG00000221287	hypermethylated
chr17_48047073_48049073	RP5-890E16.2	ENSG00000263412	hypermethylated
chr1_15225373_15227373	RP5-903E17.2	ENSG00000278480	hypermethylated
chr6_44341660_44343660	SPATS1	ENSG00000249481	hypermethylated
chr14_102773791_102775791	RP11-661D19.3	ENSG00000259508	hypomethylated
chr5_177402204_177404204	GRK6	ENSG00000198055	hypomethylated
chr7_23896335_23898335	AC009508.1	ENSG00000227930	hypermethylated
chr1_16612562_16614562	NBPF1	ENSG00000219481	hypermethylated
chr3_14946584_14948584	NR2C2	ENSG00000177463	hypermethylated
chr16_8589193_8591193	TMEM114	ENSG00000232258	hypermethylated
chr14_99511501_99513501	RP11-688G15.3	ENSG00000258749	hypomethylated
chr6_62546427_62548427	RP11-448N11.2	ENSG00000217067	hypermethylated
chr19_5850474_5852474	FUT3	ENSG00000171124	hypermethylated
chr8_129831301_129833301	RP11-473O4.5	ENSG00000254317	hypermethylated
chr16_46568097_46570097	ANKRD26P1	ENSG00000261239	hypermethylated
chr20_63695668_63697668	TNFRSF6B	ENSG00000243509	hypomethylated
chr12_123518856_123520856	RP11-972P1.11	ENSG00000278112	hypomethylated
chr2_143004791_143006791	AC013444.2	ENSG00000221169	hypomethylated
chr17_78902263_78904263	CTD-2373H9.5	ENSG00000267491	hypomethylated
chr13_75634994_75636994	LMO7-AS1	ENSG00000261105	hypermethylated
chr10_23438458_23440458	OTUD1	ENSG00000165312	hypermethylated
chr16_35140408_35142408	RP11-244B22.14	ENSG00000260449	hypermethylated
chr15_101294282_101296282	SNRPA1	ENSG00000131876	hypermethylated
chr15_101294419_101296419	RP11-299G20.2	ENSG00000259172	hypermethylated
chr22_21462963_21464963	Metazoa_SRP	ENSG00000276800	hypermethylated
chr2_130272723_130274723	AC068137.1	ENSG00000277699	hypomethylated
chr2_130272908_130274908	AC068137.5	ENSG00000236211	hypomethylated
chr4_186170257_186172257	ORAOV1P1	ENSG00000251008	hypermethylated
chr12_19175589_19177589	RN7SL459P	ENSG00000240993	hypomethylated
chr2_32320638_32322638	AL133245.2	ENSG00000272754	hypomethylated
chr21_8758077_8760077	bP-2189O9.3	ENSG00000279579	hypermethylated
chr8_42895275_42897275	MIR4469	ENSG00000266044	hypermethylated
chr7_149238651_149240651	ZNF212	ENSG00000170260	hypermethylated
chr19_31347881_31349881	AC007796.1	ENSG00000267662	hypermethylated
chr18_26132852_26134852	PSMA8	ENSG00000154611	hypomethylated
chr3_151633350_151635350	AC069067.1	ENSG00000222833	hypermethylated
chr22_42857106_42859106	ARFGAP3	ENSG00000242247	hypermethylated
chr1_54523824_54525824	RP5-866L20.2	ENSG00000237173	hypomethylated
chr15_61833752_61835752	RP11-16B9.1	ENSG00000259564	hypermethylated
chr7_150631648_150633648	GIMAP6	ENSG00000133561	hypermethylated
chr5_82277577_82279577	RPS23	ENSG00000186468	hypermethylated
chr4_75512946_75514946	THAP6	ENSG00000174796	hypermethylated
chr4_75513764_75515764	RCHY1	ENSG00000163743	hypermethylated
chr10_69593932_69595932	MTND2P15	ENSG00000231152	hypomethylated
chr6_53417737_53419737	NANOGP3	ENSG00000271373	hypomethylated
chr14_103694050_103696050	RP11-73M18.10	ENSG00000269910	hypomethylated
chr15_23143422_23145422	RP11-467N20.6	ENSG00000277505	hypomethylated
chr14_104723186_104725186	ADSSL1	ENSG00000185100	hypomethylated
chr19_43400496_43402496	TEX101	ENSG00000131126	hypomethylated
chr2_201840129_201842129	AC007242.1	ENSG00000221374	hypermethylated
chr11_65313818_65315818	CDC42EP2	ENSG00000149798	hypomethylated
chr7_76112400_76114400	AC005077.8	ENSG00000213549	hypermethylated
chr22_18523620_18525620	Metazoa_SRP	ENSG00000275319	hypermethylated
chr18_48687419_48689419	RP11-426J5.2	ENSG00000267762	hypermethylated
chr4_68128880_68130880	TMPRSS11F	ENSG00000198092	hypomethylated
chr9_31644160_31646160	HMGB3P23	ENSG00000235148	hypermethylated
chr1_225923340_225925340	PYCR2	ENSG00000143811	hypomethylated
chr3_10480963_10482963	AC090841.1	ENSG00000239167	hypomethylated
chr11_76189725_76191725	RP11-619A14.2	ENSG00000254933	hypomethylated
chr11_47613994_47615994	Y_RNA	ENSG00000280615	hypomethylated
chr2_95587149_95589149	RP11-440D17.5	ENSG00000274028	hypermethylated
chr15_23340848_23342848	RP11-529J17.5	ENSG00000260399	hypomethylated
chr10_114993657_114995657	RP11-383C6.2	ENSG00000236799	hypomethylated
chr7_98869771_98871771	TMEM130	ENSG00000166448	hypermethylated
chr12_50391383_50393383	LARP4	ENSG00000161813	hypomethylated
chr5_179731850_179733850	MAML1	ENSG00000161021	hypermethylated
chr17_43941468_43943468	PPY	ENSG00000108849	hypomethylated
chr11_76443923_76445923	C11orf30	ENSG00000158636	hypermethylated
chr3_105868552_105870552	CBLB	ENSG00000114423	hypermethylated
chr5_134925459_134927459	MTND5P11	ENSG00000248923	hypomethylated
chr2_88914378_88916378	IGKV7-3	ENSG00000197794	hypermethylated
chr8_94894767_94896767	NDUFAF6	ENSG00000156170	hypermethylated
chr16_12744873_12746873	CTD-2583P5.1	ENSG00000260378	hypomethylated
chr9_40347599_40349599	GXYLT1P3	ENSG00000232433	hypermethylated
chr5_69902198_69904198	RP11-98J23.1	ENSG00000251158	hypomethylated
chr9_134167769_134169769	LL09NC01-139C3.1	ENSG00000273473	hypomethylated
chr19_3571777_3573777	HMG20B	ENSG00000064961	hypomethylated
chr2_3518736_3520736	ADI1	ENSG00000182551	hypomethylated
chr10_48030640_48032640	CTGLF12P	ENSG00000265018	hypomethylated
chr14_101025020_101027020	MIR758	ENSG00000211582	hypomethylated
chr17_32111590_32113590	WDR45BP1	ENSG00000265574	hypermethylated
chr13_113583721_113585721	TFDP1	ENSG00000198176	hypomethylated
chr3_50321906_50323906	HYAL2	ENSG00000068001	hypomethylated
chr22_24657765_24659765	POM121L10P	ENSG00000224124	hypomethylated
chr6_170724197_170726197	XX-C2158C12.2	ENSG00000213863	hypomethylated
chr16_58775540_58777540	GEMIN8P2	ENSG00000260451	hypermethylated
chr22_50243992_50245992	TUBGCP6	ENSG00000128159	hypomethylated
chr22_21281881_21283881	POM121L8P	ENSG00000229266	hypomethylated
chr4_104489876_104491876	AC093628.1	ENSG00000272082	hypermethylated
chr18_35971151_35973151	RP11-723J4.3	ENSG00000278986	hypomethylated
chr16_2953276_2955276	LA16c-321D4.2	ENSG00000262482	hypermethylated
chr2_96937923_96939923	Metazoa_SRP	ENSG00000274206	hypomethylated
chr1_228424325_228426325	HIST3H3	ENSG00000168148	hypomethylated
chr12_128398978_128400978	RP11-553N19.1	ENSG00000257025	hypermethylated
chr1_166875327_166877327	TADA1	ENSG00000152382	hypermethylated
chr17_7424615_7426615	C17orf74	ENSG00000184560	hypomethylated
chr8_106214763_106216763	SLC16A14P1	ENSG00000213708	hypomethylated
chr13_36818224_36820224	RFXAP	ENSG00000133111	hypermethylated
chr11_46273547_46275547	CTD-2589M5.4	ENSG00000255007	hypomethylated
chr4_825198_827198	CPLX1	ENSG00000168993	hypermethylated
chr11_705715_707715	DEAF1	ENSG00000177030	hypermethylated
chr3_119172517_119174517	UPK1B	ENSG00000114638	hypomethylated
chr15_92710808_92712808	HMGN1P38	ENSG00000253954	hypomethylated
chr20_23987779_23989779	GGTLC1	ENSG00000149435	hypomethylated
chr22_37847868_37849868	EIF3L	ENSG00000100129	hypomethylated
chr19_53502392_53504392	CTD-2224J9.8	ENSG00000213777	hypermethylated
chr1_17053170_17055170	SDHB	ENSG00000117118	hypomethylated
chr4_6238441_6240441	RP11-1406H17.1	ENSG00000269908	hypomethylated
chr19_58318277_58320277	AC010642.2	ENSG00000269794	hypomethylated
chr18_3260850_3262850	RP13-270P17.1	ENSG00000264235	hypermethylated
chr18_3260909_3262909	MYL12B	ENSG00000118680	hypermethylated
chr2_64452798_64454798	AC008074.3	ENSG00000223935	hypomethylated
chr12_55816756_55818756	SARNP	ENSG00000205323	hypermethylated
chr15_66252747_66254747	MEGF11	ENSG00000157890	hypermethylated
chr5_172005873_172007873	FBXW11	ENSG00000072803	hypermethylated
chr11_69670952_69672952	AP001888.1	ENSG00000281781	hypermethylated
chr22_18023559_18025559	MICAL3	ENSG00000243156	hypomethylated
chr1_17746169_17748169	AL136529.1	ENSG00000278471	hypermethylated
chr3_46833095_46835095	PRSS42	ENSG00000178055	hypomethylated
chr6_4601420_4603420	RP4-529N6.2	ENSG00000260673	hypomethylated
chr4_158671125_158673125	ETFDH	ENSG00000171503	hypomethylated
chr1_83983300_83985300	TTLL7-IT1	ENSG00000233061	hypomethylated
chr15_101115603_101117603	RP11-424I19.1	ENSG00000259365	hypomethylated
chr12_110467364_110469364	FAM216A	ENSG00000204856	hypermethylated
chr20_4590300_4592300	RPL7AL2	ENSG00000228210	hypermethylated
chr18_71587537_71589537	RP11-752P2.1	ENSG00000264388	hypermethylated
chr9_100441271_100443271	MSANTD3-TMEFF1	ENSG00000251349	hypermethylated
chr13_110869251_110871251	LINC00346	ENSG00000255874	hypomethylated
chr15_101886767_101888767	WBP1LP5	ENSG00000259454	hypermethylated
chr9_95085096_95087096	MIR3074	ENSG00000207617	hypermethylated
chr10_68955128_68957128	DDX21	ENSG00000165732	hypermethylated
chr7_64678064_64680064	MIR6839	ENSG00000275667	hypomethylated
chr6_41100022_41102022	ADCY10P1	ENSG00000161912	hypermethylated
chr15_91030691_91032691	AC068831.17	ENSG00000275929	hypomethylated
chr10_102240474_102242474	PITX3	ENSG00000107859	hypomethylated
chr12_103586273_103588273	STAB2	ENSG00000136011	hypermethylated
chr5_179939132_179941132	CTC-563A5.4	ENSG00000249876	hypomethylated
chr9_39891446_39893446	SNORA70	ENSG00000252724	hypermethylated
chr9_39891550_39893550	RP11-204M4.1	ENSG00000232798	hypermethylated
chr3_48897993_48899993	SLC25A20	ENSG00000178537	hypomethylated
chr16_87833660_87835660	MIR6775	ENSG00000278598	hypomethylated
chr2_222317275_222319275	AC010980.2	ENSG00000237732	hypermethylated
chr9_5628025_5630025	RIC1	ENSG00000107036	hypermethylated
chr9_8712311_8714311	RP11-134K1.2	ENSG00000212695	hypomethylated
chr1_240400123_240402123	RP11-177F11.1	ENSG00000233519	hypomethylated
chr1_181412102_181414102	CACNA1E	ENSG00000198216	hypermethylated
chr11_70128297_70130297	RP11-805J14.3	ENSG00000255143	hypomethylated
chr9_62856208_62858208	MYO5BP2	ENSG00000238245	hypomethylated
chr16_848065_850065	LA16c-360A4.1	ENSG00000275438	hypomethylated
chr19_31348547_31350547	TSHZ3	ENSG00000121297	hypermethylated
chr2_94870433_94872433	TEKT4	ENSG00000163060	hypomethylated
chr14_90176222_90178222	Y_RNA	ENSG00000201351	hypermethylated
chr14_22882165_22884165	REM2	ENSG00000139890	hypomethylated
chr9_76570815_76572815	AL161626.1	ENSG00000241781	hypermethylated
chr15_22257138_22259138	RP11-603B24.2	ENSG00000259098	hypermethylated
chr14_68978440_68980440	ACTN1	ENSG00000072110	hypermethylated
chr12_132199436_132201436	RP13-977J11.3	ENSG00000279480	hypomethylated
chr10_86667449_86669449	LDB3	ENSG00000122367	hypomethylated
chr1_222617086_222619086	MIA3	ENSG00000154305	hypermethylated
chr15_92416547_92418547	snoU109	ENSG00000239197	hypomethylated
chr1_226991140_226993140	RP5-1087E8.3	ENSG00000233706	hypermethylated
chr13_27944206_27946206	ATP5EP2	ENSG00000180389	hypomethylated
chr6_16760491_16762491	ATXN1	ENSG00000124788	hypermethylated
chr17_1021559_1023559	MIR3183	ENSG00000264429	hypermethylated
chr12_43805375_43807375	TWF1	ENSG00000151239	hypermethylated
chr14_35388069_35390069	RP11-561B11.1	ENSG00000240023	hypermethylated
chr1_29349114_29351114	RP3-437I16.1	ENSG00000230523	hypermethylated
chr22_20481213_20483213	RN7SL812P	ENSG00000242876	hypomethylated
chr1_153532603_153534603	BX470102.3	ENSG00000238279	hypermethylated
chr20_64083359_64085359	LKAAEAR1	ENSG00000171695	hypermethylated
chr4_4320962_4322962	RP11-265O12.1	ENSG00000248516	hypomethylated
chr8_11557022_11559022	RP11-148O21.4	ENSG00000255518	hypomethylated
chr15_75211167_75213167	RP11-69H7.3	ENSG00000261779	hypermethylated
chr6_108558835_108560835	FOXO3	ENSG00000118689	hypermethylated
chr5_43556758_43558758	PAIP1	ENSG00000172239	hypermethylated
chr10_117829518_117831518	RP11-355F22.1	ENSG00000263041	hypermethylated
chr19_459996_461996	SHC2	ENSG00000129946	hypomethylated
chr5_1568533_1570533	AC091849.1	ENSG00000278350	hypomethylated
chr13_19226432_19228432	PSPC1P1	ENSG00000227879	hypermethylated
chr8_57278543_57280543	LINC00588	ENSG00000215117	hypomethylated
chr1_229041171_229043171	ISCA1P2	ENSG00000229840	hypermethylated
chr9_62357140_62359140	RP11-111F5.1	ENSG00000236450	hypermethylated
chr9_62357285_62359285	SNORA70	ENSG00000252133	hypermethylated
chr2_61887724_61889724	COMMD1	ENSG00000173163	hypomethylated
chr21_46036052_46038052	AP001476.2	ENSG00000224413	hypomethylated
chr1_143790687_143792687	RNU1-143P	ENSG00000252105	hypomethylated
chr1_49256411_49258411	RP11-141A19.2	ENSG00000230114	hypomethylated
chr1_225923278_225925278	RP4-559A3.7	ENSG00000255835	hypomethylated
chr19_23249390_23251390	ZNF724P	ENSG00000196081	hypermethylated
chr5_76711763_76713763	NCRUPAR_2	ENSG00000278237	hypermethylated
chr1_154962853_154964853	PYGO2	ENSG00000163348	hypomethylated
chr10_131980931_131982931	BNIP3	ENSG00000176171	hypermethylated
chr4_157075057_157077057	GLRB	ENSG00000109738	hypermethylated
chr19_6332629_6334629	ACER1	ENSG00000167769	hypomethylated
chr18_57426133_57428133	RP11-714M23.2	ENSG00000277837	hypomethylated
chr13_69221346_69223346	LINC00383	ENSG00000237534	hypomethylated
chr12_94833147_94835147	KRT19P2	ENSG00000216306	hypomethylated
chr3_44337119_44339119	TCAIM	ENSG00000179152	hypermethylated
chr3_44337552_44339552	RP11-424N24.2	ENSG00000271937	hypermethylated
chr15_62242448_62244448	AC126323.1	ENSG00000221141	hypomethylated
chr7_27199106_27201106	HOXA13	ENSG00000106031	hypermethylated
chr12_91633887_91635887	RP11-693J15.6	ENSG00000277738	hypomethylated
chr19_11578008_11580008	ACP5	ENSG00000102575	hypomethylated
chr12_20844065_20846065	RP11-80N2.2	ENSG00000256157	hypermethylated
chr2_179813251_179815251	AC092642.1	ENSG00000213126	hypermethylated
chr10_119541708_119543708	RGS10	ENSG00000148908	hypermethylated
chr3_47559524_47561524	RN7SL870P	ENSG00000244732	hypomethylated
chr18_35971083_35973083	C18orf21	ENSG00000141428	hypomethylated
chr11_3670384_3672384	CHRNA10	ENSG00000129749	hypermethylated
chr5_135745356_135747356	AC011431.1	ENSG00000223539	hypomethylated
chr6_99424331_99426331	PNISR	ENSG00000132424	hypermethylated
chr1_1058734_1060734	RP11-465B22.3	ENSG00000217801	hypermethylated
chr19_36686612_36688612	ZNF567	ENSG00000189042	hypermethylated
chr6_150938222_150940222	RNU6-302P	ENSG00000202119	hypomethylated
chr9_36168394_36170394	CCIN	ENSG00000185972	hypomethylated
chr19_47662895_47664895	AC008985.1	ENSG00000278999	hypomethylated
chr7_98453617_98455617	AC091654.7	ENSG00000213455	hypomethylated
chr7_91939867_91941867	AKAP9	ENSG00000127914	hypermethylated
chr19_52425202_52427202	DPPA5P1	ENSG00000269776	hypermethylated
chr1_65247219_65249219	DNAJC6	ENSG00000116675	hypomethylated
chr10_35157306_35159306	ATP6V1G1P4	ENSG00000233343	hypermethylated
chr1_16644622_16646622	MST1P2	ENSG00000186301	hypermethylated
chr9_95084208_95086208	MIR23B	ENSG00000207563	hypermethylated
chr14_96233101_96235101	RP11-404P21.1	ENSG00000259036	hypermethylated
chr6_35775594_35777594	CLPSL2	ENSG00000196748	hypermethylated
chr22_25178554_25180554	CTA-221G9.10	ENSG00000271181	hypomethylated
chr2_61887804_61889804	CCT4	ENSG00000115484	hypomethylated
chr6_26196250_26198250	HIST1H3D	ENSG00000197409	hypermethylated
chr15_21513144_21515144	RP11-11H9.2	ENSG00000280724	hypermethylated
chr10_13681521_13683521	RP11-295P9.8	ENSG00000268549	hypomethylated
chr14_105167824_105169824	JAG2	ENSG00000184916	hypermethylated
chr15_35773800_35775800	RP11-702M1.2	ENSG00000259217	hypermethylated
chr21_33481195_33483195	RPS5P3	ENSG00000215088	hypomethylated
chr17_35193523_35195523	SLC35G3	ENSG00000164729	hypermethylated
chr19_48962975_48964975	CTD-2639E6.9	ENSG00000267898	hypermethylated
chr8_143843068_143845068	AC234917.1	ENSG00000264144	hypomethylated
chr9_66016868_66018868	RP11-15E1.4	ENSG00000273668	hypermethylated
chr1_10998945_11000945	Y_RNA	ENSG00000281322	hypomethylated
chr13_112753693_112755693	ATP11A-AS1	ENSG00000232684	hypomethylated
chr1_6243192_6245192	HES3	ENSG00000173673	hypermethylated
chr7_6705923_6707923	ZNF12	ENSG00000164631	hypermethylated
chr15_39800333_39802333	RP11-37C7.1	ENSG00000259580	hypomethylated
chr7_69124270_69126270	RNU6-832P	ENSG00000200189	hypermethylated
chr3_145683572_145685572	GM2AP1	ENSG00000241695	hypomethylated
chr9_132581185_132583185	BARHL1	ENSG00000125492	hypermethylated
chr22_19149283_19151283	GSC2	ENSG00000063515	hypomethylated
chr17_48047329_48049329	NFE2L1	ENSG00000082641	hypermethylated
chr17_48047365_48049365	AC004477.1	ENSG00000273862	hypermethylated
chr22_38735792_38737792	RP3-508I15.20	ENSG00000273096	hypomethylated
chr20_32276664_32278664	KIF3B	ENSG00000101350	hypermethylated
chr20_32276788_32278788	AL121897.1	ENSG00000264308	hypermethylated
chr7_151082546_151084546	TMUB1	ENSG00000164897	hypomethylated
chr12_52379460_52381460	RP3-416H24.4	ENSG00000258253	hypomethylated
chr13_79480124_79482124	NDFIP2	ENSG00000102471	hypermethylated
chr13_79480231_79482231	NDFIP2-AS1	ENSG00000232132	hypermethylated
chr4_104489965_104491965	AC004053.1	ENSG00000245384	hypermethylated
chr19_44304046_44306046	ZNF235	ENSG00000159917	hypomethylated
chr14_105020148_105022148	CDCA4	ENSG00000170779	hypermethylated
chr15_65225697_65227697	RP11-628M2.1	ENSG00000279268	hypomethylated
chr1_152195699_152197699	HDHD1P2	ENSG00000233792	hypermethylated
chr2_231051040_231053040	RP11-223I10.1	ENSG00000261829	hypermethylated
chr17_7353944_7355944	RP11-542C16.1	ENSG00000263171	hypomethylated
chr3_119635150_119637150	RP11-190C22.1	ENSG00000242052	hypermethylated
chr2_95640980_95642980	AC009237.16	ENSG00000236750	hypermethylated
chr5_180809401_180811401	CTC-205M6.1	ENSG00000280161	hypermethylated
chr6_23853444_23855444	RP11-440J4.2	ENSG00000278128	hypomethylated
chr20_32009450_32011450	CCM2L	ENSG00000101331	hypermethylated
chr17_522140_524140	RP5-1029F21.4	ENSG00000263300	hypomethylated
chr22_41196456_41198456	EP300-AS1	ENSG00000231993	hypermethylated
chr7_6015877_6017877	SNORA42	ENSG00000207217	hypomethylated
chr15_81006033_81008033	C15orf26	ENSG00000156206	hypomethylated
chr11_10508189_10510189	MTRNR2L8	ENSG00000255823	hypomethylated
chr19_49858289_49860289	PTOV1-AS2	ENSG00000269352	hypomethylated
chr18_46172553_46174553	C18orf25	ENSG00000152242	hypermethylated
chr1_3132709_3134709	RP1-163G9.2	ENSG00000226286	hypomethylated
chr5_118972796_118974796	PTMAP2	ENSG00000197744	hypermethylated
chr9_131288694_131290694	PPAPDC3	ENSG00000160539	hypomethylated
chr18_22932349_22934349	MIR4741	ENSG00000264817	hypermethylated
chr3_75671391_75673391	LINC00960	ENSG00000242516	hypermethylated
chr1_3735943_3737943	TP73-AS1	ENSG00000276189	hypomethylated
chr18_23135512_23137512	AC105247.1	ENSG00000222999	hypermethylated
chr3_196043695_196045695	AC024937.2	ENSG00000228413	hypomethylated
chr1_202167051_202169051	PTPRVP	ENSG00000243323	hypermethylated
chr9_136814536_136816536	NCLP1	ENSG00000213212	hypermethylated
chr16_83930223_83932223	RP11-483P21.6	ENSG00000260932	hypomethylated
chr1_7218360_7220360	RNU1-8P	ENSG00000207056	hypermethylated
chr9_95084435_95086435	MIR27B	ENSG00000207864	hypermethylated
chr5_53858166_53860166	ASS1P9	ENSG00000217791	hypermethylated
chr22_46540495_46542495	RP3-439F8.1	ENSG00000234869	hypermethylated
chr22_50055935_50057935	TTLL8	ENSG00000138892	hypomethylated
chr15_96755987_96757987	FAM149B1P1	ENSG00000214424	hypermethylated
chr4_4174238_4176238	OR7E43P	ENSG00000249844	hypermethylated
chr12_113290523_113292523	MIR6762	ENSG00000274822	hypermethylated
chr3_52298067_52300067	GLYCTK-AS1	ENSG00000242797	hypermethylated
chr1_10226718_10228718	MIR1273D	ENSG00000264881	hypomethylated
chr5_1177605_1179605	CTD-3080P12.3	ENSG00000249201	hypomethylated
chr4_188629924_188631924	RP11-756P10.1	ENSG00000250523	hypomethylated
chr4_134326473_134328473	RP11-400D2.2	ENSG00000251199	hypomethylated
chr7_149261171_149263171	ZNF783	ENSG00000204946	hypomethylated
chr6_41920139_41922139	MED20	ENSG00000124641	hypomethylated
chr6_41920188_41922188	BYSL	ENSG00000112578	hypomethylated
chr16_31470585_31472585	TGFB1I1	ENSG00000140682	hypomethylated
chr20_5291831_5293831	UBE2D3P1	ENSG00000225022	hypermethylated
chr1_46431129_46433129	FAAHP1	ENSG00000232022	hypomethylated
chr19_19033023_19035023	SUGP2	ENSG00000064607	hypermethylated
chr7_27157344_27159344	RP1-170O19.24	ENSG00000270182	hypermethylated
chr19_22783107_22785107	ZNF99	ENSG00000213973	hypomethylated
chr12_50805437_50807437	RP11-60E8.4	ENSG00000271490	hypermethylated
chr15_70891785_70893785	THAP10	ENSG00000129028	hypermethylated
chr19_47348281_47350281	DHX34	ENSG00000134815	hypermethylated
chr3_48094105_48096105	RN7SL664P	ENSG00000265078	hypermethylated
chr15_69462026_69464026	RP11-279F6.1	ENSG00000245750	hypermethylated
chr19_6361149_6363149	CTB-180A7.3	ENSG00000269802	hypomethylated
chr3_48093957_48095957	AC124916.2	ENSG00000281238	hypermethylated
chr18_12749068_12751068	RP11-973H7.5	ENSG00000266961	hypermethylated
chr10_2075089_2077089	MIR6072	ENSG00000278069	hypomethylated
chr1_47164920_47166920	MTND1P34	ENSG00000225514	hypermethylated
chr9_137062535_137064535	RP11-229P13.23	ENSG00000231864	hypomethylated
chr3_175977570_175979570	RP11-809F4.2	ENSG00000230362	hypermethylated
chr14_20872592_20874592	RP11-219E7.3	ENSG00000259130	hypermethylated
chr12_51847223_51849223	RP11-923I11.5	ENSG00000259887	hypomethylated
chr12_6567691_6569691	NOP2	ENSG00000111641	hypomethylated
chr17_3471374_3473374	ASPA	ENSG00000108381	hypomethylated
chr16_28494575_28496575	CLN3	ENSG00000188603	hypermethylated
chr10_73729466_73731466	RP11-464F9.1	ENSG00000242288	hypermethylated
chr10_73729469_73731469	BMS1P4	ENSG00000242338	hypermethylated
chr10_73729487_73731487	BMS1P4	ENSG00000271816	hypermethylated
chr10_73729562_73731562	GLUD1P3	ENSG00000250959	hypermethylated
chr12_55816919_55818919	ORMDL2	ENSG00000123353	hypermethylated
chr15_85769578_85771578	MIR1276	ENSG00000221634	hypomethylated
chr9_137637408_137639408	Metazoa_SRP	ENSG00000274841	hypermethylated
chr1_25910749_25912749	AL033528.1	ENSG00000266763	hypomethylated
chr5_170762350_170764350	GABRP	ENSG00000094755	hypomethylated
chr22_37966563_37968563	MIR6820	ENSG00000277321	hypomethylated
chr8_99118352_99120352	CTD-2340D6.1	ENSG00000253532	hypermethylated
chr13_78658179_78660179	RNF219	ENSG00000152193	hypermethylated
chr2_88015547_88017547	RNU2-63P	ENSG00000222724	hypomethylated
chr17_8559471_8561471	RP11-713H12.2	ENSG00000270606	hypomethylated
chr2_22187336_22189336	AC068044.1	ENSG00000223691	hypomethylated
chr22_30420045_30422045	RNU6-564P	ENSG00000222915	hypermethylated
chr7_73338200_73340200	RNU6-1080P	ENSG00000206709	hypomethylated
chr3_6489479_6491479	AC069277.2	ENSG00000189229	hypomethylated
chr17_41314695_41316695	KRTAP17-1	ENSG00000186860	hypomethylated
chr3_113631704_113633704	RN7SL767P	ENSG00000241529	hypomethylated
chr17_30708299_30710299	SUZ12P1	ENSG00000264538	hypermethylated
chr1_173867882_173869882	GAS5	ENSG00000234741	hypermethylated
chr10_6293684_6295684	SDCBPP1	ENSG00000226705	hypermethylated
chr19_14369196_14371196	CTC-548K16.2	ENSG00000266913	hypermethylated
chr3_123960408_123962408	CCDC14	ENSG00000175455	hypermethylated
chr2_75597071_75599071	AC005034.2	ENSG00000230477	hypomethylated
chr16_48432208_48434208	Metazoa_SRP	ENSG00000275909	hypomethylated
chr7_128689451_128691451	RP11-274B21.9	ENSG00000271344	hypermethylated
chr16_3085143_3087143	RNU1-22P	ENSG00000200204	hypermethylated
chr6_35442044_35444044	MKRNP2	ENSG00000227154	hypomethylated
chr22_30419512_30421512	RP4-539M6.20	ENSG00000273350	hypermethylated
chr16_274980_276980	RGS11	ENSG00000076344	hypermethylated
chr16_31009628_31011628	STX1B	ENSG00000099365	hypomethylated
chr6_149863026_149865026	LRP11	ENSG00000120256	hypermethylated
chr9_14316085_14318085	RP11-120J1.1	ENSG00000225472	hypermethylated
chr12_122702343_122704343	HCAR2	ENSG00000182782	hypomethylated
chr5_5395968_5397968	RP11-531A21.2	ENSG00000251476	hypermethylated
chr12_48394392_48396392	OR5BJ1P	ENSG00000257792	hypomethylated
chr15_79751049_79753049	RP11-591L14.1	ENSG00000213527	hypermethylated
chr1_34165883_34167883	C1orf94	ENSG00000142698	hypermethylated
chr5_140820604_140822604	PCDHA5	ENSG00000204965	hypermethylated
chr17_48930791_48932791	AC091133.1	ENSG00000230532	hypomethylated
chr4_106432624_106434624	RP13-612N21.1	ENSG00000249613	hypermethylated
chr21_29221321_29223321	GAPDHP14	ENSG00000236056	hypermethylated
chr1_114779685_114781685	SIKE1	ENSG00000052723	hypermethylated
chr3_52230190_52232190	RP11-330H6.5	ENSG00000173366	hypomethylated
chr12_92701843_92703843	C12orf74	ENSG00000214215	hypermethylated
chr15_101048456_101050456	RP11-505E24.3	ENSG00000259376	hypomethylated
chr22_27706580_27708580	RP1-213J1P__B.2	ENSG00000231495	hypomethylated
chr16_11964107_11966107	TNFRSF17	ENSG00000048462	hypomethylated
chr16_70754098_70756098	VAC14-AS1	ENSG00000214353	hypomethylated
chr9_137169051_137171051	LRRC26	ENSG00000184709	hypomethylated
chr20_40688240_40690240	MAFB	ENSG00000204103	hypermethylated
chr9_95425796_95427796	RP11-435O5.2	ENSG00000237857	hypermethylated
chr3_133928812_133930812	C3orf36	ENSG00000221972	hypomethylated
chr14_96930367_96932367	AL133168.3	ENSG00000258825	hypomethylated
chr5_72724419_72726419	RPL7P22	ENSG00000226544	hypomethylated
chr15_95131859_95133859	RP11-255M2.2	ENSG00000258773	hypermethylated
chr10_21524682_21526682	SKIDA1	ENSG00000180592	hypermethylated
chr4_3462311_3464311	DOK7	ENSG00000175920	hypermethylated
chr20_50839749_50841749	TMSB4XP6	ENSG00000230043	hypomethylated
chr14_35143480_35145480	RP11-173D9.1	ENSG00000241052	hypomethylated
chr1_206332438_206334438	RP11-421E17.4	ENSG00000229509	hypermethylated
chr6_104939527_104941527	LINC00577	ENSG00000203809	hypomethylated
chr5_134370179_134372179	UBE2B	ENSG00000119048	hypermethylated
chr19_10835318_10837318	TMED1	ENSG00000099203	hypermethylated
chr2_132346297_132348297	RP11-725P16.2	ENSG00000272769	hypermethylated
chr15_41401519_41403519	NDUFAF1	ENSG00000137806	hypomethylated
chr12_94833398_94835398	MIR492	ENSG00000208038	hypomethylated
chr7_28956667_28958667	AC005013.5	ENSG00000228421	hypomethylated
chr5_146509116_146511116	uc_338	ENSG00000277568	hypermethylated
chr16_710277_712277	LA16c-380A1.1	ENSG00000259840	hypomethylated
chr22_18637405_18639405	XXbac-B33L19.11	ENSG00000273907	hypomethylated
chr2_138412318_138414318	AC097721.1	ENSG00000232915	hypomethylated
chr19_41858918_41860918	RPS19	ENSG00000105372	hypermethylated
chr2_237590020_237592020	AC104667.3	ENSG00000234949	hypomethylated
chr15_72449657_72451657	RP11-1007O24.4	ENSG00000271072	hypomethylated
chr11_125940193_125942193	RP11-680F20.4	ENSG00000254790	hypermethylated
chr4_9780680_9782680	DRD5	ENSG00000169676	hypomethylated
chr18_76638011_76640011	RP11-111H3.3	ENSG00000266312	hypermethylated
chr12_48788037_48790037	ADCY6	ENSG00000174233	hypermethylated
chr12_48788147_48790147	RP11-579D7.4	ENSG00000257660	hypermethylated
chr21_46051596_46053596	AP001476.4	ENSG00000228235	hypomethylated
chr8_23705598_23707598	NKX2-6	ENSG00000180053	hypomethylated
chr17_78397304_78399304	AC061992.1	ENSG00000281727	hypomethylated
chr4_134326063_134328063	PES1P1	ENSG00000248191	hypomethylated
chr17_78854478_78856478	RP11-323N12.5	ENSG00000267601	hypomethylated
chr15_23646841_23648841	MAGEL2	ENSG00000254585	hypermethylated
chr15_74815223_74817223	RP11-414J4.2	ENSG00000261606	hypermethylated
chr16_68741480_68743480	RNA5SP429	ENSG00000200558	hypomethylated
chr16_68741495_68743495	AC099314.1	ENSG00000281454	hypomethylated
chr15_56917623_56919623	TCF12	ENSG00000140262	hypermethylated
chr16_78021515_78023515	CLEC3A	ENSG00000166509	hypermethylated
chr11_1918562_1920562	TNNT3	ENSG00000130595	hypermethylated
chr11_102745968_102747968	WTAPP1	ENSG00000255282	hypomethylated
chr12_55220025_55222025	OR10A7	ENSG00000179919	hypermethylated
chr3_143517229_143519229	ST13P15	ENSG00000243759	hypermethylated
chr9_92669265_92671265	IPPK	ENSG00000127080	hypermethylated
chr12_53993895_53995895	HOXC9	ENSG00000180806	hypermethylated
chr1_200472920_200474920	RP11-469A15.2	ENSG00000230623	hypermethylated
chr1_212284537_212286537	PPP2R5A	ENSG00000066027	hypermethylated
chr16_12373355_12375355	RP11-165M1.1	ENSG00000278979	hypermethylated
chr8_94895678_94897678	CCNE2	ENSG00000175305	hypermethylated
chr11_119728084_119730084	PVRL1	ENSG00000110400	hypermethylated
chr15_25210796_25212796	SNORD115-23	ENSG00000201331	hypermethylated
chr15_40368640_40370640	RP11-64K12.4	ENSG00000259368	hypomethylated
chr4_147616245_147618245	RP11-425A23.1	ENSG00000251298	hypomethylated
chr4_147616383_147618383	TMEM184C	ENSG00000164168	hypomethylated
chr5_38467339_38469339	CTD-2263F21.1	ENSG00000251257	hypomethylated
chr2_27307445_27309445	UCN	ENSG00000163794	hypomethylated
chr3_48093876_48095876	AC124916.1	ENSG00000281068	hypermethylated
chr19_11207195_11209195	CTC-510F12.3	ENSG00000279807	hypomethylated
chr19_21708522_21710522	RP11-420K14.3	ENSG00000268535	hypomethylated
chr7_134743252_134745252	CALD1	ENSG00000122786	hypermethylated
chr2_25007946_25009946	Y_RNA	ENSG00000207069	hypermethylated
chr1_6613607_6615607	KLHL21	ENSG00000162413	hypermethylated
chr4_82899684_82901684	THAP9	ENSG00000168152	hypermethylated
chr15_20638890_20640890	IGHV1OR15-6	ENSG00000270685	hypermethylated
chr1_94246908_94248908	RP11-148B18.1	ENSG00000231363	hypermethylated
chr7_141917817_141919817	OR9A4	ENSG00000258083	hypermethylated
chr1_1433861_1435861	VWA1	ENSG00000179403	hypermethylated
chr8_76680219_76682219	ZFHX4	ENSG00000091656	hypomethylated
chr9_34133696_34135696	RP11-537H15.4	ENSG00000239392	hypomethylated
chr9_4984033_4986033	JAK2	ENSG00000096968	hypermethylated
chr21_16069522_16071522	MIR99AHG	ENSG00000215386	hypomethylated
chr19_43185536_43187536	PSG5	ENSG00000204941	hypomethylated
chr8_96260715_96262715	PTDSS1	ENSG00000156471	hypermethylated
chr8_9435205_9437205	RP11-115J16.2	ENSG00000254237	hypermethylated
chr21_43995420_43997420	RNU6-1150P	ENSG00000252606	hypomethylated
chr18_57837476_57839476	RSL24D1P11	ENSG00000231544	hypermethylated
chr7_122885759_122887759	CADPS2	ENSG00000081803	hypermethylated
chr8_100149584_100151584	POLR2K	ENSG00000147669	hypermethylated
chr14_35120846_35122846	KIAA0391	ENSG00000100890	hypermethylated
chr10_6061325_6063325	IL2RA	ENSG00000134460	hypomethylated
chr17_81396144_81398144	RP11-1055B8.1	ENSG00000279692	hypermethylated
chr17_44655404_44657404	C17orf104	ENSG00000180336	hypomethylated
chr6_71584089_71586089	AL354933.1	ENSG00000211530	hypomethylated
chr8_30094398_30096398	LEPROTL1	ENSG00000104660	hypermethylated
chr22_47630569_47632569	LINC00898	ENSG00000205634	hypomethylated
chr2_85888014_85890014	ST3GAL5	ENSG00000115525	hypermethylated
chr11_43879726_43881726	RP11-613D13.5	ENSG00000246250	hypermethylated
chr11_43879811_43881811	ALKBH3	ENSG00000166199	hypermethylated
chr8_65633217_65635217	ARMC1	ENSG00000104442	hypomethylated
chr6_137493250_137495250	OLIG3	ENSG00000177468	hypermethylated
chr2_15563170_15565170	AC008278.2	ENSG00000234022	hypermethylated
chr5_94617122_94619122	CTC-303L1.2	ENSG00000270133	hypermethylated
chr5_94617347_94619347	ANKRD32	ENSG00000133302	hypermethylated
chr5_94617604_94619604	KIAA0825	ENSG00000185261	hypermethylated
chr1_117093643_117095643	MIR942	ENSG00000215930	hypomethylated
chr20_19211646_19213646	SLC24A3	ENSG00000185052	hypermethylated
chr17_81665364_81667364	CCDC137	ENSG00000185298	hypomethylated
chr13_98434840_98436840	FARP1-AS1	ENSG00000231194	hypomethylated
chr7_57769966_57771966	RP11-548K12.7	ENSG00000232161	hypomethylated
chr2_230907852_230909852	AC012507.4	ENSG00000230385	hypermethylated
chr15_74488602_74490602	RP11-10O17.3	ENSG00000261775	hypermethylated
chr7_75834663_75836663	AC005102.1	ENSG00000219039	hypomethylated
chr12_131895500_131897500	RP11-417L19.5	ENSG00000279283	hypomethylated
chr9_105243622_105245622	SLC44A1	ENSG00000070214	hypermethylated
chr6_108786053_108788053	ZNF259P1	ENSG00000219565	hypermethylated
chr19_58024926_58026926	VN2R19P	ENSG00000235974	hypomethylated
chr6_159588169_159590169	RP3-393E18.2	ENSG00000237927	hypomethylated
chr13_39654627_39656627	COG6	ENSG00000133103	hypermethylated
chr7_70836738_70838738	RP11-575M4.1	ENSG00000236978	hypomethylated
chr10_117240923_117242923	RP11-501J20.5	ENSG00000225936	hypermethylated
chr12_132621973_132623973	RP13-554M15.5	ENSG00000280311	hypomethylated
chr7_144285966_144287966	ARHGEF34P	ENSG00000204959	hypomethylated
chr13_39037306_39039306	NHLRC3	ENSG00000188811	hypermethylated
chr7_63925306_63927306	RP11-73B2.6	ENSG00000227910	hypermethylated
chr3_186078170_186080170	ETV5-AS1	ENSG00000234197	hypermethylated
chr7_130490033_130492033	MESTIT1	ENSG00000272701	hypomethylated
chr21_36359630_36361630	AP000692.9	ENSG00000228107	hypermethylated
chr11_67652404_67654404	AP003385.2	ENSG00000227834	hypermethylated
chr2_240585699_240587699	CAPN10-AS1	ENSG00000260942	hypermethylated
chr2_240585716_240587716	CAPN10	ENSG00000142330	hypermethylated
chr1_67540127_67542127	RNU6-1031P	ENSG00000207504	hypomethylated
chr7_105818492_105820492	CTA-351J1.1	ENSG00000226624	hypomethylated
chr2_16854284_16856284	AC008069.2	ENSG00000224604	hypermethylated
chr21_30165756_30167756	CLDN17	ENSG00000156282	hypermethylated
chr11_60491778_60493778	MS4A12	ENSG00000071203	hypomethylated
chr2_95524345_95526345	AC009237.8	ENSG00000229689	hypomethylated
chr11_49858402_49860402	RP11-163O19.11	ENSG00000255550	hypomethylated
chr9_126717333_126719333	AL161731.1	ENSG00000266403	hypermethylated
chr5_122077285_122079285	LOX	ENSG00000113083	hypermethylated
chr15_82471203_82473203	RP13-608F4.5	ENSG00000278603	hypomethylated
chr4_75400195_75402195	RP11-567N4.3	ENSG00000250735	hypomethylated
chr7_76977617_76979617	DTX2P1	ENSG00000186704	hypomethylated
chr12_57823692_57825692	MIR26A2	ENSG00000207789	hypomethylated
chr1_54627438_54629438	RP11-240D10.4	ENSG00000230728	hypomethylated
chr17_76452206_76454206	UBE2O	ENSG00000175931	hypermethylated
chr14_106011420_106013420	IGHV4-4	ENSG00000276775	hypomethylated
chr1_109425427_109427427	PSMA5	ENSG00000143106	hypermethylated
chr19_10835575_10837575	C19orf38	ENSG00000214212	hypermethylated
chr17_46832154_46834154	WNT3	ENSG00000108379	hypomethylated
chr17_46832201_46834201	WNT9B	ENSG00000158955	hypomethylated
chr11_124610490_124612490	PANX3	ENSG00000154143	hypomethylated
chr22_47630674_47632674	RP11-191L9.4	ENSG00000224271	hypomethylated
chr8_96260610_96262610	MTERF3	ENSG00000156469	hypermethylated
chr9_32566126_32568126	DFFBP1	ENSG00000232303	hypomethylated
chr1_184036729_184038729	COLGALT2	ENSG00000198756	hypomethylated
chr12_64882394_64884394	RP11-766N7.3	ENSG00000255693	hypomethylated
chr1_107055679_107057679	PRMT6	ENSG00000198890	hypermethylated
chr1_238484445_238486445	RP11-177F15.1	ENSG00000231877	hypermethylated
chr5_5395335_5397335	RP11-531A21.4	ENSG00000250808	hypermethylated
chr12_52600467_52602467	KRT73-AS1	ENSG00000257495	hypermethylated
chr12_52600538_52602538	KRT72	ENSG00000170486	hypermethylated
chr4_39527311_39529311	UGDH	ENSG00000109814	hypermethylated
chr15_58586507_58588507	RP11-50C13.1	ENSG00000259250	hypermethylated
chr17_39961973_39963973	GSDMA	ENSG00000167914	hypomethylated
chr19_39263382_39265382	IFNL4P1	ENSG00000272311	hypermethylated
chr5_100049362_100051362	RP11-475J5.6	ENSG00000270906	hypomethylated
chr5_100049365_100051365	AC113407.1	ENSG00000264839	hypomethylated
chr12_132744156_132746156	RP13-672B3.5	ENSG00000256108	hypomethylated
chr20_3845799_3847799	MAVS	ENSG00000088888	hypermethylated
chr19_33926625_33928625	RN7SL150P	ENSG00000240626	hypermethylated
chr14_75115600_75117600	HIF1AP1	ENSG00000258978	hypermethylated
chr5_43142514_43144514	RP11-447H19.4	ENSG00000278487	hypomethylated
chr15_44662678_44664678	SPG11	ENSG00000104133	hypermethylated
chr7_72924125_72926125	RP11-313P13.5	ENSG00000272843	hypermethylated
chr9_90432505_90434505	LINC01508	ENSG00000231107	hypermethylated
chr19_50909738_50911738	KLK4	ENSG00000167749	hypomethylated
chr5_134927036_134929036	MTND4P12	ENSG00000247627	hypomethylated
chr5_134927039_134929039	MIR4461	ENSG00000263963	hypomethylated
chr1_206473803_206475803	MIR6769B	ENSG00000278465	hypomethylated
chr11_71547418_71549418	KRTAP5-9	ENSG00000254997	hypomethylated
chr20_50556998_50558998	RN7SL672P	ENSG00000239742	hypomethylated
chr2_95639604_95641604	AC009237.17	ENSG00000235959	hypermethylated
chr2_49877623_49879623	RPL7P13	ENSG00000234253	hypomethylated
chr5_168231357_168233357	CTB-178M22.2	ENSG00000253978	hypomethylated
chr4_153788120_153790120	SFRP2	ENSG00000145423	hypermethylated
chr1_190623890_190625890	RP11-463J7.2	ENSG00000231175	hypermethylated
chr9_134526182_134528182	RP11-473E2.4	ENSG00000228877	hypermethylated
chr15_69413246_69415246	KIF23	ENSG00000137807	hypermethylated
chr22_25741144_25743144	MYO18B	ENSG00000133454	hypermethylated
chr7_100948555_100950555	MUC3A	ENSG00000169894	hypermethylated
chr20_18812726_18814726	SCP2D1	ENSG00000132631	hypomethylated
chr16_85488813_85490813	LA16c-352F7.1	ENSG00000278716	hypomethylated
chr10_29288061_29290061	LYZL1	ENSG00000120563	hypermethylated
chr21_39171106_39173106	PCBP2P1	ENSG00000235701	hypomethylated
chr8_144290370_144292370	BOP1	ENSG00000261236	hypermethylated
chr15_41162162_41164162	FAM92A1P1	ENSG00000157021	hypomethylated
chr15_43776543_43778543	ELL3	ENSG00000128886	hypomethylated
chr2_157961888_157963888	AC005539.2	ENSG00000228937	hypermethylated
chr10_73739823_73741823	RP11-574K11.27	ENSG00000270808	hypermethylated
chr11_103091215_103093215	DCUN1D5	ENSG00000137692	hypermethylated
chr7_99597066_99599066	GS1-259H13.2	ENSG00000244219	hypermethylated
chr2_222317653_222319653	RP11-384O8.1	ENSG00000267034	hypermethylated
chr3_119467938_119469938	POGLUT1	ENSG00000163389	hypermethylated
chr17_75999906_76001906	CDK3	ENSG00000250506	hypomethylated
chr7_100820264_100822264	RN7SL750P	ENSG00000263672	hypomethylated
chr6_26500221_26502221	BTN1A1	ENSG00000124557	hypomethylated
chr6_110476907_110478907	CTA-331P3.1	ENSG00000260188	hypomethylated
chr1_54541257_54543257	ACOT11	ENSG00000162390	hypermethylated
chr17_31708568_31710568	RP11-805L22.1	ENSG00000266448	hypermethylated
chr1_202192901_202194901	LGR6	ENSG00000133067	hypomethylated
chr13_64711072_64713072	AL356253.1	ENSG00000277097	hypermethylated
chr6_6937897_6939897	RN7SL554P	ENSG00000240936	hypomethylated
chr1_50422500_50424500	DMRTA2	ENSG00000142700	hypermethylated
chr5_30247350_30249350	RP11-136H13.1	ENSG00000250587	hypomethylated
chr12_131757047_131759047	RP11-495K9.5	ENSG00000255933	hypomethylated
chr19_20124044_20126044	CTC-260E6.2	ENSG00000224864	hypomethylated
chr20_16585693_16587693	RPLP0P1	ENSG00000226229	hypermethylated
chr5_149344430_149346430	GRPEL2	ENSG00000164284	hypermethylated
chr3_130111550_130113550	RP11-77P16.4	ENSG00000249846	hypermethylated
chr9_35095378_35097378	RP11-182N22.8	ENSG00000234181	hypermethylated
chr9_35095601_35097601	PIGO	ENSG00000165282	hypermethylated
chr14_50830121_50832121	NIN	ENSG00000100503	hypermethylated
chr16_85780899_85782899	RNU1-103P	ENSG00000252311	hypomethylated
chr5_112892333_112894333	CTC-487M23.5	ENSG00000270067	hypermethylated
chr11_32591771_32593771	HNRNPA3P9	ENSG00000270903	hypomethylated
chr7_103279410_103281410	DPY19L2P2	ENSG00000170629	hypermethylated
chr10_73840833_73842833	RP11-574K11.8	ENSG00000229990	hypermethylated
chr11_7088027_7090027	RBMXL2	ENSG00000170748	hypomethylated
chr1_238485023_238487023	LINC01139	ENSG00000215808	hypermethylated
chr22_30238194_30240194	RP1-102K2.6	ENSG00000232530	hypermethylated
chr2_231436421_231438421	AC017104.4	ENSG00000230047	hypomethylated
chr4_76305026_76307026	FAM47E-STBD1	ENSG00000118804	hypermethylated
chr12_120116502_120118502	RAB35	ENSG00000111737	hypermethylated
chr13_112965131_112967131	RP11-120K24.3	ENSG00000267868	hypomethylated
chr15_25066788_25068788	SNORD116-7	ENSG00000207133	hypomethylated
chr9_67718178_67720178	FAM27E3	ENSG00000274026	hypomethylated
chr18_36066576_36068576	RPRD1A	ENSG00000141425	hypermethylated
chr18_37565037_37567037	CELF4	ENSG00000101489	hypomethylated
chr3_128852008_128854008	MARK2P6	ENSG00000242062	hypermethylated
chr19_11112474_11114474	MIR6886	ENSG00000273892	hypomethylated
chr5_75510756_75512756	POLK	ENSG00000122008	hypermethylated
chr16_1772207_1774207	EME2	ENSG00000197774	hypermethylated
chr4_71186286_71188286	SLC4A4	ENSG00000080493	hypermethylated
chr6_32177096_32179096	AGPAT1	ENSG00000204310	hypermethylated
chr6_32177354_32179354	RNF5	ENSG00000204308	hypermethylated
chr19_52280797_52282797	MIR643	ENSG00000208002	hypomethylated
chr19_51210080_51212080	SIGLEC22P	ENSG00000268849	hypomethylated
chr2_111264283_111266283	AC068491.2	ENSG00000229118	hypomethylated
chr22_49656542_49658542	C22orf34	ENSG00000188511	hypermethylated
chr14_100883697_100885697	MIR136	ENSG00000207942	hypomethylated
chr3_170036929_170038929	GPR160	ENSG00000173890	hypermethylated
chr9_122836557_122838557	KRT18P67	ENSG00000233425	hypermethylated
chr3_170061244_170063244	RP11-379K17.9	ENSG00000242583	hypermethylated
chr22_24685923_24687923	AP000357.4	ENSG00000224334	hypermethylated
chr8_74603244_74605244	RP11-730G20.2	ENSG00000253341	hypermethylated
chr2_42424088_42426088	COX7A2L	ENSG00000115944	hypomethylated
chr16_2105753_2107753	MIR6511B1	ENSG00000273879	hypomethylated
chr10_90856698_90858698	HTR7	ENSG00000148680	hypermethylated
chr9_133352831_133354831	AL593848.2	ENSG00000281114	hypermethylated
chr16_75565351_75567351	GABARAPL2	ENSG00000034713	hypermethylated
chr8_144354609_144356609	TMEM249	ENSG00000271698	hypomethylated
chr2_38376285_38378285	ATL2	ENSG00000119787	hypermethylated
chr3_75657534_75659534	RARRES2P1	ENSG00000241622	hypermethylated
chr5_75373463_75375463	CTD-2235C13.1	ENSG00000242198	hypermethylated
chr6_110475641_110477641	SLC22A16	ENSG00000004809	hypomethylated
chr2_219684381_219686381	AC009502.4	ENSG00000227308	hypermethylated
chr13_21529690_21531690	FNTAP2	ENSG00000230022	hypermethylated
chr2_238554054_238556054	LINC01107	ENSG00000225493	hypomethylated
chr1_61653194_61655194	RP11-430G17.1	ENSG00000223920	hypomethylated
chr16_57734730_57736730	KATNB1	ENSG00000140854	hypomethylated
chr7_3300448_3302448	SDK1	ENSG00000146555	hypermethylated
chr17_42576831_42578831	PSMC3IP	ENSG00000131470	hypermethylated
chr9_100098040_100100040	ERP44	ENSG00000023318	hypermethylated
chr9_100098256_100100256	INVS	ENSG00000119509	hypermethylated
chr9_65735555_65737555	FOXD4L4	ENSG00000184659	hypomethylated
chr2_306683_308683	RP11-356M6.1	ENSG00000277997	hypermethylated
chr4_15093094_15095094	RN7SKP170	ENSG00000199420	hypomethylated
chr15_58769974_58771974	RP11-30K9.6	ENSG00000245975	hypermethylated
chr14_101024550_101026550	MIR1197	ENSG00000221745	hypomethylated
chr14_22870613_22872613	LRP10	ENSG00000197324	hypomethylated
chr8_37598858_37600858	RP11-150O12.3	ENSG00000254290	hypomethylated
chr2_27628012_27630012	CCDC121	ENSG00000176714	hypermethylated
chr3_50610520_50612520	MAPKAPK3	ENSG00000114738	hypermethylated
chr19_49063259_49065259	CTB-60B18.18	ENSG00000268287	hypomethylated
chr16_72005543_72007543	ATP5A1P3	ENSG00000263232	hypomethylated
chr2_241701035_241703035	ING5	ENSG00000168395	hypomethylated
chr19_58557960_58559960	UBE2M	ENSG00000130725	hypermethylated
chr9_95771323_95773323	RP11-180I4.4	ENSG00000268926	hypomethylated
chr16_804443_806443	PRR25	ENSG00000167945	hypomethylated
chr16_70522565_70524565	COG4	ENSG00000103051	hypermethylated
chr1_27958462_27960462	XKR8	ENSG00000158156	hypomethylated
chr2_105248794_105250794	RP11-332H14.1	ENSG00000272861	hypomethylated
chr3_179260273_179262273	LRRFIP1P1	ENSG00000240429	hypermethylated
chr7_6364441_6366441	RP11-425P5.1	ENSG00000274319	hypomethylated
chr15_79431516_79433516	KIAA1024	ENSG00000169330	hypermethylated
chr1_145406772_145408772	PFN1P3	ENSG00000234367	hypomethylated
chr19_45178822_45180822	AC005779.2	ENSG00000267545	hypomethylated
chr2_240255035_240257035	AC124861.1	ENSG00000227479	hypomethylated
chr8_48555441_48557441	RP11-567J20.2	ENSG00000253688	hypermethylated
chr18_595988_597988	CLUL1	ENSG00000079101	hypermethylated
chr10_103451402_103453402	CALHM2	ENSG00000138172	hypermethylated
chr1_5667295_5669295	RP11-154H17.1	ENSG00000236948	hypermethylated
chr19_17733513_17735513	CTD-3149D2.4	ENSG00000268112	hypomethylated
chr13_19457718_19459718	CYCSP32	ENSG00000223625	hypomethylated
chr5_134370044_134372044	CTD-2410N18.4	ENSG00000273345	hypermethylated
chr5_134370047_134372047	CDKL3	ENSG00000006837	hypermethylated
chr6_56431442_56433442	AL137008.1	ENSG00000266793	hypomethylated
chr17_78902217_78904217	KIAA1731NL	ENSG00000178404	hypomethylated
chr2_241800907_241802907	AC114730.5	ENSG00000215023	hypermethylated
chr13_63837031_63839031	RP11-394A14.4	ENSG00000272299	hypomethylated
chr16_88695501_88697501	RP5-1142A6.5	ENSG00000259813	hypomethylated
chr2_241733579_241735579	D2HGDH	ENSG00000180902	hypermethylated
chr14_101024712_101026712	MIR323A	ENSG00000199069	hypomethylated
chr22_24685168_24687168	ARL5AP4	ENSG00000224806	hypermethylated
chr12_123514513_123516513	RP11-972P1.10	ENSG00000274427	hypermethylated
chr22_45604621_45606621	CTA-941F9.9	ENSG00000238120	hypomethylated
chr3_50610831_50612831	CISH	ENSG00000114737	hypermethylated
chr16_60358842_60360842	RP11-354I13.2	ENSG00000261436	hypomethylated
chr7_143361770_143363770	FAM131B	ENSG00000159784	hypermethylated
chr6_149862494_149864494	RAET1E-AS1	ENSG00000268592	hypermethylated
chr16_88650152_88652152	CYBA	ENSG00000051523	hypomethylated
chr1_154974693_154976693	MIR4258	ENSG00000264349	hypermethylated
chr11_18171837_18173837	MRGPRX4	ENSG00000179817	hypomethylated
chr22_21651270_21653270	PPIL2	ENSG00000100023	hypomethylated
chr12_109092631_109094631	ALKBH2	ENSG00000189046	hypomethylated
chr5_4865521_4867521	CTD-2046I8.1	ENSG00000249941	hypomethylated
chr14_24336382_24338382	RP11-934B9.3	ENSG00000258973	hypermethylated
chr1_155977799_155979799	RP11-336K24.12	ENSG00000273002	hypermethylated
chr1_113758489_113760489	PHTF1	ENSG00000116793	hypermethylated
chr2_224499100_224501100	AC073052.1	ENSG00000228446	hypermethylated
chr18_3246086_3248086	RP13-270P17.3	ENSG00000272688	hypermethylated
chr5_137965337_137967337	AC106753.1	ENSG00000277843	hypomethylated
chr4_107719452_107721452	PAPSS1	ENSG00000138801	hypermethylated
chr2_233565782_233567782	USP40	ENSG00000085982	hypermethylated
chr7_76460676_76462676	DTX2	ENSG00000091073	hypomethylated
chr22_38680820_38682820	RP3-508I15.9	ENSG00000228274	hypermethylated
chr22_38680948_38682948	TOMM22	ENSG00000100216	hypermethylated
chr1_112619825_112621825	ST7L	ENSG00000007341	hypomethylated
chr5_44388706_44390706	FGF10	ENSG00000070193	hypermethylated
chr14_76777952_76779952	RP11-488C13.7	ENSG00000258610	hypomethylated
chr8_98941827_98943827	STK3	ENSG00000104375	hypermethylated
chr6_26194566_26196566	HIST1H1PS1	ENSG00000216331	hypermethylated
chr7_92589394_92591394	FAM133B	ENSG00000234545	hypermethylated
chr20_56729397_56731397	RP5-897D18.1	ENSG00000231604	hypermethylated
chr20_1001264_1003264	RSPO4	ENSG00000101282	hypomethylated
chr11_63562383_63564383	HRASLS2	ENSG00000133328	hypomethylated
chr11_321727_323727	RP11-326C3.14	ENSG00000270105	hypermethylated
chr18_80146924_80148924	PARD6G-AS1	ENSG00000267270	hypermethylated
chr8_144583040_144585040	CTD-2517M22.9	ENSG00000255456	hypomethylated
chr11_74987134_74989134	NEU3	ENSG00000162139	hypermethylated
chr12_120522443_120524443	RPL29P24	ENSG00000241030	hypermethylated
chr17_4832388_4834388	MINK1	ENSG00000141503	hypomethylated
chr6_3623747_3625747	RP1-223B1.1	ENSG00000228793	hypermethylated
chr19_58558129_58560129	MZF1-AS1	ENSG00000267858	hypermethylated
chr4_164928951_164930951	FAM218BP	ENSG00000221891	hypomethylated
chr4_9051051_9053051	SNRPCP16	ENSG00000250342	hypomethylated
chr16_50741815_50743815	RP11-327F22.1	ENSG00000260929	hypermethylated
chr9_15054057_15056057	RP11-54D18.4	ENSG00000234297	hypermethylated
chr17_46938860_46940860	RP11-63A1.4	ENSG00000280158	hypermethylated
chr3_10010116_10012116	EMC3	ENSG00000125037	hypermethylated
chr16_69756937_69758937	CTD-2033A16.2	ENSG00000260290	hypomethylated
chr2_86198355_86200355	MRPL35	ENSG00000132313	hypomethylated
chr1_22450851_22452851	ZBTB40	ENSG00000184677	hypermethylated
chr21_17505453_17507453	RN7SL163P	ENSG00000266195	hypomethylated
chr19_49689573_49691573	CTB-33G10.6	ENSG00000268677	hypermethylated
chr11_50169156_50171156	RP11-347H15.1	ENSG00000255442	hypomethylated
chr6_27806931_27808931	HIST1H2BL	ENSG00000185130	hypermethylated
chr6_27807199_27809199	HIST1H2AI	ENSG00000196747	hypermethylated
chr6_35296852_35298852	DEF6	ENSG00000023892	hypomethylated
chr9_131530268_131532268	UCK1	ENSG00000130717	hypomethylated
chr1_12773841_12775841	PRAMEF12	ENSG00000116726	hypomethylated
chr20_34121470_34123470	RPS2P1	ENSG00000225246	hypermethylated
chr1_41241373_41243373	RP11-399E6.1	ENSG00000235358	hypermethylated
chr15_25235085_25237085	SNORD115-36	ENSG00000202499	hypomethylated
chr8_123273487_123275487	ZHX1-C8orf76	ENSG00000259305	hypermethylated
chr12_124637444_124639444	RP11-83B20.10	ENSG00000279087	hypermethylated
chr12_51345679_51347679	CELA1	ENSG00000139610	hypomethylated
chr2_16049427_16051427	GACAT3	ENSG00000236289	hypomethylated
chr19_8444597_8446597	RP11-886P16.10	ENSG00000279827	hypermethylated
chr6_50912256_50914256	FTH1P5	ENSG00000230204	hypermethylated
chr3_58236506_58238506	ABHD6	ENSG00000163686	hypermethylated
chr19_42079107_42081107	CTB-59C6.3	ENSG00000268525	hypermethylated
chr4_147004492_147006492	RP11-292D4.3	ENSG00000260090	hypomethylated
chr2_176506702_176508702	AC017048.1	ENSG00000229434	hypermethylated
chr11_111448868_111450868	RP11-794P6.3	ENSG00000255208	hypomethylated
chr3_33076204_33078204	SUMO2P10	ENSG00000235424	hypomethylated
chr19_36379912_36381912	CTD-3162L10.4	ENSG00000267363	hypomethylated
chr2_208136697_208138697	AC093698.4	ENSG00000224529	hypermethylated
chr21_7769546_7771546	CH507-396I9.7	ENSG00000277277	hypermethylated
chr8_51256688_51258688	RP11-401H2.1	ENSG00000253664	hypermethylated
chr19_57118138_57120138	USP29	ENSG00000131864	hypermethylated
chr19_10779254_10781254	MIR4748	ENSG00000265879	hypomethylated
chr2_95296304_95298304	KCNIP3	ENSG00000115041	hypomethylated
chr2_197434091_197436091	SF3B1	ENSG00000115524	hypermethylated
chr9_96301152_96303152	HSD17B3	ENSG00000130948	hypomethylated
chr4_39931454_39933454	TCEB1P33	ENSG00000271278	hypermethylated
chr4_9552985_9554985	RP11-1396O13.1	ENSG00000242034	hypomethylated
chr3_39137206_39139206	MIR6822	ENSG00000276236	hypomethylated
chr19_9323174_9325174	ZNF559-ZNF177	ENSG00000270011	hypomethylated
chr10_68406294_68408294	RUFY2	ENSG00000204130	hypermethylated
chr16_60522250_60524250	RP11-354I13.1	ENSG00000261310	hypermethylated
chr19_49960172_49962172	SIGLEC11	ENSG00000161640	hypermethylated
chr20_63830244_63832244	ZBTB46	ENSG00000130584	hypermethylated
chr2_183037858_183039858	NCKAP1	ENSG00000061676	hypomethylated
chr1_18108389_18110389	RP11-174G17.3	ENSG00000280222	hypomethylated
chr15_89678427_89680427	PLIN1	ENSG00000166819	hypermethylated
chr12_105235238_105237238	APPL2	ENSG00000136044	hypermethylated
chr9_127396138_127398138	SLC2A8	ENSG00000136856	hypomethylated
chr3_15737515_15739515	RN7SL4P	ENSG00000263740	hypomethylated
chr3_15737657_15739657	AC090950.1	ENSG00000281814	hypomethylated
chr10_58326030_58328030	RP11-179B15.6	ENSG00000261076	hypomethylated
chr15_89883030_89885030	MIR5009	ENSG00000264796	hypomethylated
chr10_125972126_125974126	FANK1-AS1	ENSG00000233409	hypermethylated
chr7_27156936_27158936	HOXA7	ENSG00000122592	hypermethylated
chr22_31082565_31084565	RP3-412A9.16	ENSG00000273387	hypermethylated
chr1_200872038_200874038	GPR25	ENSG00000170128	hypomethylated
chr16_65232056_65234056	RP11-256I9.3	ENSG00000260364	hypermethylated
chr16_12371812_12373812	RP11-165M1.2	ENSG00000260723	hypermethylated
chr4_337583_339583	RP11-478C6.2	ENSG00000248564	hypermethylated
chr16_68736225_68738225	CDH1	ENSG00000039068	hypomethylated
chr10_133349726_133351726	RP11-122K13.7	ENSG00000226699	hypermethylated
chr20_25228150_25230150	RP5-965G21.3	ENSG00000277938	hypomethylated
chr6_31944650_31946650	CFB	ENSG00000243649	hypermethylated
chr20_47957022_47959022	RP11-347D21.2	ENSG00000228503	hypomethylated
chr2_239161357_239163357	AC017028.10	ENSG00000280260	hypermethylated
chr16_1275522_1277522	RP11-616M22.10	ENSG00000261564	hypermethylated
chr12_56448403_56450403	TIMELESS	ENSG00000111602	hypermethylated
chr10_2498721_2500721	RP11-526P5.1	ENSG00000237500	hypermethylated
chr20_18466127_18468127	POLR3F	ENSG00000132664	hypermethylated
chr5_17584758_17586758	RP11-432M8.2	ENSG00000250807	hypermethylated
chr1_155243699_155245699	GBA	ENSG00000177628	hypomethylated
chr1_201920736_201922736	AC099676.1	ENSG00000278750	hypomethylated
chr11_35137870_35139870	CD44	ENSG00000026508	hypermethylated
chr2_79157374_79159374	AC011754.1	ENSG00000224879	hypermethylated
chr3_128462594_128464594	DNAJB8-AS1	ENSG00000242049	hypomethylated
chr11_129590493_129592493	RP11-237N19.3	ENSG00000281386	hypermethylated
chr9_133162945_133164945	GBGT1	ENSG00000148288	hypermethylated
chr7_95470835_95472835	AC004012.1	ENSG00000233942	hypermethylated
chr8_41620502_41622502	RP11-360L9.8	ENSG00000264578	hypomethylated
chr5_21483011_21485011	RP11-823P9.3	ENSG00000233974	hypomethylated
chr10_72729557_72731557	RP11-354E23.3	ENSG00000280166	hypomethylated
chr3_25323174_25325174	CFL1P7	ENSG00000213877	hypermethylated
chr6_81751774_81753774	FAM46A	ENSG00000112773	hypermethylated
chr7_72869510_72871510	SPDYE7P	ENSG00000179994	hypermethylated
chr19_55835800_55837800	NLRP11	ENSG00000179873	hypomethylated
chr1_143419207_143421207	CH17-13I23.3	ENSG00000277702	hypomethylated
chr13_30158621_30160621	LINC00384	ENSG00000232117	hypermethylated
chr8_38600200_38602200	RNF5P1	ENSG00000253570	hypermethylated
chr1_16616391_16618391	RP5-1182A14.5	ENSG00000271732	hypermethylated
chr19_53511616_53513616	CTB-167G5.7	ENSG00000274892	hypomethylated
chr1_1377666_1379666	RP5-890O3.3	ENSG00000223663	hypermethylated
chr12_95472520_95474520	METAP2	ENSG00000111142	hypomethylated
chr9_129619776_129621776	C9orf50	ENSG00000179058	hypomethylated
chr3_157162932_157164932	KRT18P34	ENSG00000244515	hypomethylated
chr3_57169306_57171306	IL17RD	ENSG00000144730	hypermethylated
chr8_74320130_74322130	GDAP1	ENSG00000104381	hypermethylated
chr13_110914069_110916069	ANKRD10	ENSG00000088448	hypermethylated
chr2_237797389_237799389	RBM44	ENSG00000177483	hypomethylated
chr8_130442660_130444660	ASAP1	ENSG00000153317	hypermethylated
chr18_80160752_80162752	AC139100.4	ENSG00000278000	hypomethylated
chr22_49959513_49961513	PIM3	ENSG00000198355	hypomethylated
chr13_36130306_36132306	DCLK1	ENSG00000133083	hypermethylated
chr14_39386102_39388102	RP11-1074O12.1	ENSG00000259100	hypomethylated
chr1_51250472_51252472	RP11-296A18.5	ENSG00000233406	hypermethylated
chr7_116952899_116954899	ST7-OT4	ENSG00000214188	hypermethylated
chr16_73940524_73942524	RPSAP56	ENSG00000225178	hypomethylated
chr9_128410751_128412751	CERCAM	ENSG00000167123	hypomethylated
chr11_62791021_62793021	TMEM223	ENSG00000168569	hypomethylated
chr9_34567015_34569015	CNTFR-AS1	ENSG00000237159	hypomethylated
chr12_121711752_121713752	TMEM120B	ENSG00000188735	hypermethylated
chr2_161243739_161245739	AC009299.3	ENSG00000227403	hypermethylated
chr19_45487777_45489777	PPM1N	ENSG00000213889	hypomethylated
chr15_28552638_28554638	RP11-578F21.4	ENSG00000227717	hypermethylated
chr5_175903371_175905371	RP11-91H12.1	ENSG00000280068	hypomethylated
chr3_156043948_156045948	ALG1L15P	ENSG00000242017	hypomethylated
chr12_112381439_112383439	HECTD4	ENSG00000173064	hypermethylated
chr10_102055193_102057193	C10orf76	ENSG00000120029	hypomethylated
chr10_123007817_123009817	IKZF5	ENSG00000095574	hypermethylated
chr17_43679273_43681273	CTC-501O10.1	ENSG00000267440	hypomethylated
chr10_86755298_86757298	RP11-359E3.4	ENSG00000272631	hypermethylated
chr17_49965176_49967176	RNU6-1313P	ENSG00000199492	hypermethylated
chr22_47859671_47861671	RP13-455A7.1	ENSG00000230345	hypermethylated
chr15_26938539_26940539	GABRB3	ENSG00000166206	hypomethylated
chr8_133002075_133004075	CTD-2182N23.1	ENSG00000240237	hypomethylated
chr15_28737384_28739384	GOLGA8M	ENSG00000188626	hypermethylated
chr15_28737431_28739431	RP11-578F21.6	ENSG00000261480	hypermethylated
chr16_31471108_31473108	RP11-452L6.6	ENSG00000280132	hypomethylated
chr3_141937547_141939547	RP11-271K21.12	ENSG00000279147	hypomethylated
chr19_45405349_45407349	PPP1R13L	ENSG00000104881	hypermethylated
chr2_1743852_1745852	PXDN	ENSG00000130508	hypomethylated
chr16_55759548_55761548	CES1P1	ENSG00000228695	hypomethylated
chr3_129324426_129326426	NUP210P3	ENSG00000248916	hypomethylated
chr6_149878962_149880962	CCT7P1	ENSG00000217733	hypomethylated
chr7_99499324_99501324	ZNF394	ENSG00000160908	hypermethylated
chr4_1720490_1722490	TACC3	ENSG00000013810	hypermethylated
chr6_147507927_147509927	SAMD5	ENSG00000203727	hypermethylated
chr4_120065958_120067958	RP11-679C8.2	ENSG00000250938	hypermethylated
chr15_89087267_89089267	RP11-326A19.3	ENSG00000261407	hypomethylated
chr6_27806075_27808075	HIST1H4PS1	ENSG00000217862	hypermethylated
chr16_74606144_74608144	GLG1	ENSG00000090863	hypermethylated
chr14_106257223_106259223	IGHV3-22	ENSG00000253957	hypermethylated
chr9_61971240_61973240	RP11-374M1.2	ENSG00000231527	hypomethylated
chr6_11093033_11095033	SMIM13	ENSG00000224531	hypermethylated
chr4_3243369_3245369	MSANTD1	ENSG00000188981	hypomethylated
chr8_37479089_37481089	RP11-150O12.2	ENSG00000253388	hypomethylated
chr8_68292818_68294818	RPL31P40	ENSG00000253964	hypomethylated
chr1_185071035_185073035	FTH1P25	ENSG00000232792	hypermethylated
chr22_38700556_38702556	JOSD1	ENSG00000100221	hypomethylated
chr16_47504432_47506432	RNA5SP425	ENSG00000222268	hypermethylated
chr7_132752023_132754023	SNORD46	ENSG00000201009	hypomethylated
chr1_149605334_149607334	LINC00869	ENSG00000277147	hypermethylated
chr9_41647023_41649023	RP11-157L3.5	ENSG00000276135	hypomethylated
chr6_27807553_27809553	AL009179.1	ENSG00000281258	hypermethylated
chr2_46077828_46079828	AC017006.2	ENSG00000232696	hypermethylated
chr20_34824649_34826649	NCOA6	ENSG00000198646	hypermethylated
chr15_22772063_22774063	NIPA1	ENSG00000170113	hypomethylated
chr17_29339822_29341822	RPL35AP35	ENSG00000239256	hypomethylated
chr2_174574227_174576227	AC010894.5	ENSG00000237798	hypermethylated
chr16_28930939_28932939	CD19	ENSG00000177455	hypomethylated
chr15_49793246_49795246	CTD-2647E9.1	ENSG00000259388	hypermethylated
chr16_5837661_5839661	RP11-19H6.1	ENSG00000270440	hypomethylated
chr22_20494883_20496883	KLHL22	ENSG00000099910	hypermethylated
chr22_20494913_20496913	MED15	ENSG00000099917	hypermethylated
chr5_149603417_149605417	AC021078.1	ENSG00000221135	hypermethylated
chr3_128140977_128142977	RNU6-823P	ENSG00000212344	hypermethylated
chr7_87933143_87935143	ADAM22	ENSG00000008277	hypermethylated
chr19_49762330_49764330	TSKS	ENSG00000126467	hypomethylated
chr2_201070433_201072433	NDUFB3	ENSG00000119013	hypomethylated
chr12_62933607_62935607	AC078814.1	ENSG00000275729	hypermethylated
chr16_57970116_57972116	CNGB1	ENSG00000070729	hypomethylated
chr9_133050996_133052996	MIR6877	ENSG00000273932	hypermethylated
chr11_70077302_70079302	ANO1	ENSG00000131620	hypomethylated
chr11_33075460_33077460	PIGCP1	ENSG00000213713	hypomethylated
chr15_97520811_97522811	CTD-2147F2.2	ENSG00000259664	hypomethylated
chr17_7022020_7024020	BCL6B	ENSG00000161940	hypomethylated
chr16_80064836_80066836	RP11-525K10.1	ENSG00000260706	hypermethylated
chr5_98575341_98577341	CTBP2P4	ENSG00000251102	hypermethylated
chr7_69400303_69402303	RNU6-229P	ENSG00000252423	hypermethylated
chr2_87565764_87567764	AC133644.3	ENSG00000214354	hypermethylated
chr6_168288350_168290350	CTAGE13P	ENSG00000230711	hypomethylated
chr22_38397929_38399929	RP3-449O17.1	ENSG00000244627	hypermethylated
chr13_106941561_106943561	RP11-282A11.2	ENSG00000279157	hypomethylated
chr11_3320862_3322862	NDUFA5P1	ENSG00000232390	hypermethylated
chr15_65044370_65046370	SLC51B	ENSG00000186198	hypomethylated
chr15_37100299_37102299	MEIS2	ENSG00000134138	hypermethylated
chr11_75239905_75241905	TPBGL	ENSG00000261594	hypomethylated
chr4_127469569_127471569	RP11-125O18.1	ENSG00000248491	hypomethylated
chr2_104852183_104854183	LINC01158	ENSG00000233639	hypermethylated
chr16_2987961_2989961	LA16c-380H5.1	ENSG00000262152	hypermethylated
chr16_89560434_89562434	SNORD68	ENSG00000200084	hypomethylated
chr9_97635051_97637051	RP11-244N9.4	ENSG00000231521	hypermethylated
chr2_132670579_132672579	LYPD1	ENSG00000150551	hypomethylated
chr3_14123870_14125870	CHCHD4	ENSG00000163528	hypermethylated
chr6_52360421_52362421	PAQR8	ENSG00000170915	hypermethylated
chr20_17225107_17227107	PCSK2	ENSG00000125851	hypermethylated
chr20_45971172_45973172	ZNF335	ENSG00000198026	hypomethylated
chr1_156366873_156368873	CCT3	ENSG00000163468	hypermethylated
chr11_74492733_74494733	LIPT2	ENSG00000175536	hypermethylated
chr19_45405209_45407209	CD3EAP	ENSG00000117877	hypermethylated
chr6_25023483_25025483	ASS1P1	ENSG00000220517	hypomethylated
chr1_150573552_150575552	ADAMTSL4-AS1	ENSG00000203804	hypermethylated
chr11_66335840_66337840	RIN1	ENSG00000174791	hypomethylated
chr8_74320328_74322328	JPH1	ENSG00000104369	hypermethylated
chr3_87792629_87794629	RP11-451B8.1	ENSG00000239572	hypermethylated
chr1_212664434_212666434	RP11-338C15.3	ENSG00000237980	hypermethylated
chr15_71817396_71819396	CTD-2524L6.3	ENSG00000260037	hypermethylated
chr17_29010009_29012009	RP11-321A17.5	ENSG00000263613	hypermethylated
chr20_23357116_23359116	LINC01431	ENSG00000232645	hypermethylated
chr5_157858175_157860175	CLINT1	ENSG00000113282	hypermethylated
chr2_241843380_241845380	AC114730.2	ENSG00000235151	hypomethylated
chr19_35907295_35909295	TYROBP	ENSG00000011600	hypermethylated
chr10_101779369_101781369	FGF8	ENSG00000107831	hypermethylated
chr4_82899960_82901960	THAP9-AS1	ENSG00000251022	hypermethylated
chr4_82900166_82902166	SEC31A	ENSG00000138674	hypermethylated
chr13_19170194_19172194	SMPD4P2	ENSG00000229147	hypomethylated
chr19_10269835_10271835	ICAM1	ENSG00000090339	hypermethylated
chr4_139014789_139016789	CCRN4L	ENSG00000151014	hypermethylated
chr6_158515229_158517229	CACYBPP3	ENSG00000219188	hypomethylated
chr16_171847_173847	HBA2	ENSG00000188536	hypomethylated
chr3_72877102_72879102	PSMD12P	ENSG00000240135	hypomethylated
chr3_51390268_51392268	RBM15B	ENSG00000259956	hypomethylated
chr5_84383793_84385793	EDIL3	ENSG00000164176	hypermethylated
chr9_131008082_131010082	LAMC3	ENSG00000050555	hypomethylated
chr2_172555596_172557596	AC093818.1	ENSG00000225205	hypermethylated
chr9_32565789_32567789	GVQW1	ENSG00000241043	hypomethylated
chr15_39585561_39587561	CTD-2033D15.2	ENSG00000276107	hypermethylated
chr13_39037076_39039076	PROSER1	ENSG00000120685	hypermethylated
chr17_7354123_7356123	TMEM95	ENSG00000182896	hypomethylated
chr6_166905451_166907451	RPS6KA2	ENSG00000071242	hypomethylated
chr2_31233337_31235337	EHD3	ENSG00000013016	hypermethylated
chr2_177391644_177393644	AGPS	ENSG00000018510	hypermethylated
chr2_177391691_177393691	AC074286.1	ENSG00000213963	hypermethylated
chr2_177391697_177393697	NFE2L2	ENSG00000116044	hypermethylated
chr14_100883483_100885483	MIR432	ENSG00000272458	hypomethylated
chr9_134867236_134869236	RP11-263F14.3	ENSG00000232355	hypermethylated
chr12_34217853_34219853	RP11-313F23.4	ENSG00000255652	hypomethylated
chr1_40783012_40785012	KCNQ4	ENSG00000117013	hypomethylated
chr7_157867538_157869538	RP11-452C13.1	ENSG00000272839	hypomethylated
chr8_143017437_143019437	RP11-273G15.2	ENSG00000247317	hypermethylated
chr19_19789531_19791531	CTC-559E9.5	ENSG00000267481	hypomethylated
chr17_39224872_39226872	STAC2	ENSG00000141750	hypermethylated
chr5_216279_218279	CTD-2083E4.4	ENSG00000260774	hypermethylated
chr19_35024335_35026335	CTD-2527I21.14	ENSG00000271032	hypermethylated
chr19_53981307_53983307	MIR935	ENSG00000215998	hypomethylated
chr17_7350889_7352889	KCTD11	ENSG00000213859	hypomethylated
chr15_59675757_59677757	PIGHP1	ENSG00000259657	hypomethylated
chr6_15244000_15246000	RP11-560J1.2	ENSG00000271888	hypermethylated
chr12_123648068_123650068	RP11-338K17.5	ENSG00000279953	hypomethylated
chr14_74473864_74475864	RP3-449M8.6	ENSG00000259005	hypermethylated
chr18_74389297_74391297	FAUP1	ENSG00000235297	hypomethylated
chr2_104852285_104854285	RP11-13J10.1	ENSG00000269707	hypermethylated
chr17_22330597_22332597	RP11-744K17.3	ENSG00000266806	hypermethylated
chr16_1095244_1097244	C1QTNF8	ENSG00000184471	hypomethylated
chr22_22643473_22645473	POM121L1P	ENSG00000183169	hypomethylated
chr22_22643475_22645475	GGTLC2	ENSG00000100121	hypomethylated
chr14_103528072_103530072	RP11-600F24.7	ENSG00000260285	hypomethylated
chr9_124860981_124862981	RPL35	ENSG00000136942	hypermethylated
chr1_162560308_162562308	RP11-359K18.3	ENSG00000259788	hypermethylated
chr1_162560506_162562506	UAP1	ENSG00000117143	hypermethylated
chr2_89191752_89193752	IGKV3-25	ENSG00000253202	hypomethylated
chr13_73647253_73649253	LINC00393	ENSG00000224853	hypermethylated
chr10_44487445_44489445	RP11-733D4.2	ENSG00000270767	hypermethylated
chr1_150779272_150781272	RP11-363I22.3	ENSG00000236713	hypomethylated
chr15_56917571_56919571	ZNF280D	ENSG00000137871	hypermethylated
chr12_104124236_104126236	RNA5SP370	ENSG00000199415	hypomethylated
chr12_104124268_104126268	AC089983.1	ENSG00000280646	hypomethylated
chr13_113008671_113010671	RP11-120K24.5	ENSG00000269376	hypermethylated
chr2_237084312_237086312	COPS8	ENSG00000198612	hypermethylated
chr15_41342080_41344080	RP11-16O9.2	ENSG00000259396	hypomethylated
chr21_39183469_39185469	AF129408.17	ENSG00000272991	hypermethylated
chr10_50675743_50677743	NUTM2HP	ENSG00000232706	hypomethylated
chr1_109508738_109510738	AMIGO1	ENSG00000181754	hypomethylated
chr15_85769990_85771990	RP11-158M2.6	ENSG00000259195	hypomethylated
chr15_66346342_66348342	SCARNA14	ENSG00000252712	hypomethylated
chr6_98947006_98949006	FBXL4	ENSG00000112234	hypermethylated
chr11_61791980_61793980	FADS2	ENSG00000134824	hypermethylated
chr10_5595118_5597118	RP13-463N16.6	ENSG00000242147	hypomethylated
chr8_81521232_81523232	FTH1P11	ENSG00000237264	hypermethylated
chr14_100881965_100883965	MIR127	ENSG00000207608	hypomethylated
chr17_40025409_40027409	MIR6884	ENSG00000275267	hypermethylated
chr6_31571054_31573054	LTA	ENSG00000226979	hypermethylated
chr15_75677548_75679548	CTD-2026K11.6	ENSG00000203392	hypomethylated
chr2_74482073_74484073	TTC31	ENSG00000115282	hypermethylated
chr9_95505235_95507235	RP11-435O5.5	ENSG00000271155	hypermethylated
chr11_63680446_63682446	RTN3	ENSG00000133318	hypermethylated
chr1_144640371_144642371	RP11-289H16.1	ENSG00000224363	hypermethylated
chr19_8502112_8504112	PRAM1	ENSG00000133246	hypomethylated
chr7_150367189_150369189	REPIN1	ENSG00000214022	hypermethylated
chr1_47000087_47002087	CYP4A27P	ENSG00000261593	hypomethylated
chr3_119578268_119580268	ADPRH	ENSG00000144843	hypermethylated
chr10_43789387_43791387	HNRNPA3P1	ENSG00000226790	hypermethylated
chr20_63217041_63219041	RP5-963E22.6	ENSG00000273821	hypermethylated
chr19_45937282_45939282	AC008623.1	ENSG00000280818	hypomethylated
chr7_99442496_99444496	AC073063.10	ENSG00000228335	hypomethylated
chr8_48657894_48659894	RP11-770E5.2	ENSG00000253892	hypermethylated
chr14_100588326_100590326	CTD-2644I21.1	ENSG00000258576	hypomethylated
chr22_43109748_43111748	BIK	ENSG00000100290	hypermethylated
chr8_141277228_141279228	RP11-10J21.5	ENSG00000254197	hypomethylated
chr8_17921840_17923840	PCM1	ENSG00000078674	hypermethylated
chr8_144698185_144700185	AF186192.1	ENSG00000254533	hypomethylated
chr5_174335295_174337295	LINC01411	ENSG00000249306	hypomethylated
chr12_50111197_50113197	RP4-605O3.4	ENSG00000272368	hypermethylated
chr10_5411551_5413551	NET1	ENSG00000173848	hypermethylated
chr14_93346191_93348191	COX8C	ENSG00000187581	hypomethylated
chr17_68100538_68102538	AC145343.1	ENSG00000278219	hypermethylated
chr9_97632626_97634626	NCBP1	ENSG00000136937	hypermethylated
chr5_140826958_140828958	PCDHA6	ENSG00000081842	hypomethylated
chr4_9520910_9522910	RP11-1396O13.22	ENSG00000249443	hypomethylated
chr7_68287233_68289233	RP5-945F2.3	ENSG00000226829	hypermethylated
chr19_7057640_7059640	MBD3L3	ENSG00000182315	hypomethylated
chr19_39267514_39269514	IFNL2	ENSG00000183709	hypomethylated
chr19_22619483_22621483	CTC-457E21.7	ENSG00000268589	hypomethylated
chr1_151805154_151807154	LINGO4	ENSG00000213171	hypermethylated
chr19_19032575_19034575	ARMC6	ENSG00000105676	hypermethylated
chr1_153438949_153440949	S100A7L2	ENSG00000197364	hypermethylated
chr20_59190020_59192020	ZNF831	ENSG00000124203	hypomethylated
chr1_11876770_11878770	RP5-934G17.6	ENSG00000224904	hypomethylated
chr22_37281027_37283027	CYTH4	ENSG00000100055	hypomethylated
chr18_74226506_74228506	RN7SL551P	ENSG00000243856	hypermethylated
chr2_208024560_208026560	PLEKHM3	ENSG00000178385	hypermethylated
chr3_48561015_48563015	PFKFB4	ENSG00000114268	hypomethylated
chr9_97632575_97634575	TSTD2	ENSG00000136925	hypermethylated
chr22_36203840_36205840	APOL4	ENSG00000100336	hypermethylated
chr1_154949492_154951492	Metazoa_SRP	ENSG00000268154	hypomethylated
chr5_159915783_159917783	ADRA1B	ENSG00000170214	hypomethylated
chr17_80338898_80340898	CTD-2047H16.3	ENSG00000280248	hypomethylated
chr20_63177500_63179500	MIR124-3	ENSG00000207598	hypermethylated
chr2_95433759_95435759	AC009238.8	ENSG00000233275	hypermethylated
chr1_63325984_63327984	MIR6068	ENSG00000275836	hypermethylated
chr1_44843082_44845082	RP5-882O7.1	ENSG00000226499	hypomethylated
chr10_37993863_37995863	Y_RNA	ENSG00000206840	hypomethylated
chr7_156892230_156894230	LMBR1	ENSG00000105983	hypermethylated
chr9_4298390_4300390	RP11-358M14.2	ENSG00000228322	hypermethylated
chr10_68423560_68425560	RP11-9E13.4	ENSG00000234806	hypomethylated
chr17_81692757_81694757	MIR6786	ENSG00000277784	hypomethylated
chr17_22434390_22436390	RP11-744K17.2	ENSG00000266885	hypermethylated
chr17_22434392_22436392	RP11-744K17.7	ENSG00000264543	hypermethylated
chr17_22434629_22436629	RP11-744K17.8	ENSG00000265705	hypermethylated
chr14_91417266_91419266	RP11-895M11.3	ENSG00000258798	hypermethylated
chr17_62006518_62008518	RP11-342K2.1	ENSG00000279133	hypermethylated
chr11_11569084_11571084	RP11-483L5.1	ENSG00000255462	hypermethylated
chr17_45131600_45133600	ACBD4	ENSG00000181513	hypermethylated
chr14_22765522_22767522	OXA1L	ENSG00000155463	hypermethylated
chr14_22765562_22767562	CTD-2555K7.2	ENSG00000258458	hypermethylated
chr17_29971514_29973514	RP11-338L22.3	ENSG00000264435	hypomethylated
chr18_57621213_57623213	NARS	ENSG00000134440	hypermethylated
chr12_79934460_79936460	PPP1R12A	ENSG00000058272	hypermethylated
chr5_135119526_135121526	CTC-276P9.2	ENSG00000248753	hypomethylated
chr1_223363202_223365202	SUSD4	ENSG00000143502	hypermethylated
chr11_70282955_70284955	MIR548K	ENSG00000221333	hypermethylated
chr21_8196620_8198620	CH507-513H4.1	ENSG00000278996	hypomethylated
chr1_21439128_21441128	NBPF3	ENSG00000142794	hypermethylated
chr17_2400118_2402118	MNT	ENSG00000070444	hypermethylated
chr17_30557502_30559502	RP11-218M11.6	ENSG00000266775	hypomethylated
chr9_3688626_3690626	RP11-509J21.4	ENSG00000226669	hypomethylated
chr5_849986_851986	ZDHHC11	ENSG00000188818	hypomethylated
chr15_58770192_58772192	FAM63B	ENSG00000128923	hypermethylated
chr3_48685364_48687364	NCKIPSD	ENSG00000213672	hypomethylated
chr9_41643770_41645770	RP11-157L3.4	ENSG00000275493	hypomethylated
chr9_41643771_41645771	RP11-157L3.10	ENSG00000278077	hypomethylated
chr2_127106355_127108355	BIN1	ENSG00000136717	hypomethylated
chr5_65414353_65416353	CTD-2375G15.1	ENSG00000205644	hypermethylated
chr16_75218000_75220000	CTRB1	ENSG00000168925	hypomethylated
chr2_74482408_74484408	CCDC142	ENSG00000135637	hypermethylated
chr2_157875702_157877702	UPP2	ENSG00000007001	hypermethylated
chr12_120722193_120724193	MIR4700	ENSG00000265455	hypomethylated
chr19_1439839_1441839	CTB-25B13.5	ENSG00000268798	hypomethylated
chr22_21416404_21418404	HIC2	ENSG00000169635	hypomethylated
chr5_176387975_176389975	NOP16	ENSG00000048162	hypomethylated
chr17_62625031_62627031	CTD-3035K23.6	ENSG00000277463	hypomethylated
chr10_116741574_116743574	HSPA12A	ENSG00000165868	hypomethylated
chr16_29271220_29273220	RP11-426C22.8	ENSG00000277999	hypomethylated
chr22_35230056_35232056	LINC01399	ENSG00000233080	hypermethylated
chr6_41071945_41073945	NFYA	ENSG00000001167	hypermethylated
chr14_98843896_98845896	AL132796.1	ENSG00000237342	hypermethylated
chr3_184260463_184262463	CAMK2N2	ENSG00000163888	hypermethylated
chr11_65128978_65130978	MIR6751	ENSG00000277547	hypomethylated
chr1_180229286_180231286	LHX4	ENSG00000121454	hypermethylated
chr3_182690928_182692928	RP11-646E18.3	ENSG00000243378	hypermethylated
chr7_138798560_138800560	ATP6V0A4	ENSG00000105929	hypomethylated
chr5_150000167_150002167	TIGD6	ENSG00000164296	hypermethylated
chr11_133531519_133533519	OPCML	ENSG00000183715	hypermethylated
chr14_100405599_100407599	RP11-362L22.1	ENSG00000258620	hypomethylated
chr1_145168519_145170519	U1	ENSG00000277678	hypomethylated
chr10_110495204_110497204	RP11-525A16.4	ENSG00000273143	hypermethylated
chr3_44728596_44730596	ZNF501	ENSG00000186446	hypermethylated
chr11_73509658_73511658	RP11-809N8.5	ENSG00000256148	hypermethylated
chr7_156539491_156541491	LINC00244	ENSG00000279418	hypomethylated
chr5_146515190_146517190	GPR151	ENSG00000173250	hypermethylated
chr11_71902194_71904194	OR7E126P	ENSG00000254593	hypermethylated
chr2_109312625_109314625	MIR4266	ENSG00000265965	hypomethylated
chr7_1266353_1268353	AC073094.4	ENSG00000233082	hypomethylated
chr12_101876351_101878351	DRAM1	ENSG00000136048	hypermethylated
chr9_97237700_97239700	RP11-498P14.5	ENSG00000203279	hypermethylated
chr16_84238750_84240750	KCNG4	ENSG00000168418	hypermethylated
chr17_17980572_17982572	AC087163.3	ENSG00000230273	hypermethylated
chr7_102670629_102672629	POLR2J2	ENSG00000228049	hypomethylated
chr7_102670660_102672660	POLR2J2	ENSG00000267645	hypomethylated
chr7_142543212_142545212	TRBV10-3	ENSG00000275791	hypermethylated
chr6_155313493_155315493	TFB1M	ENSG00000029639	hypermethylated
chr2_218831086_218833086	PRKAG3	ENSG00000115592	hypermethylated
chr17_68100908_68102908	LINC00674	ENSG00000237854	hypermethylated
chr19_20610559_20612559	CTD-2332E11.2	ENSG00000268560	hypomethylated
chr19_2281176_2283176	C19orf35	ENSG00000188305	hypomethylated
chr12_8141697_8143697	GCSHP4	ENSG00000256171	hypermethylated
chr1_155226422_155228422	GBAP1	ENSG00000160766	hypermethylated
chr16_59754026_59756026	APOOP5	ENSG00000260240	hypomethylated
chr8_143695154_143697154	RP11-429J17.2	ENSG00000181097	hypomethylated
chr17_68100474_68102474	AC145343.2	ENSG00000265055	hypermethylated
chr10_114968568_114970568	RNU6-1121P	ENSG00000252611	hypermethylated
chr10_123007979_123009979	ACADSB	ENSG00000196177	hypermethylated
chr8_38973164_38975164	HTRA4	ENSG00000169495	hypermethylated
chr16_52654307_52656307	RP11-297L17.6	ENSG00000234337	hypomethylated
chr1_51344116_51346116	TTC39A	ENSG00000085831	hypomethylated
chr9_129574409_129576409	RP11-492E3.2	ENSG00000227619	hypomethylated
chr10_38246922_38248922	RP11-672F9.1	ENSG00000226113	hypomethylated
chr10_34487878_34489878	TCEB2P4	ENSG00000234167	hypermethylated
chr3_154428715_154430715	GPR149	ENSG00000174948	hypermethylated
chr8_144528132_144530132	C8orf82	ENSG00000213563	hypomethylated
chr9_71674_73674	PGM5P3-AS1	ENSG00000277631	hypermethylated
chr3_195687008_195689008	AC233280.3	ENSG00000276635	hypomethylated
chr10_104217883_104219883	MIR609	ENSG00000208033	hypomethylated
chr7_151409727_151411727	WDR86	ENSG00000187260	hypomethylated
chr1_88890944_88892944	GTF2B	ENSG00000137947	hypermethylated
chr2_175166904_175168904	AC096649.2	ENSG00000229750	hypermethylated
chr2_175167382_175169382	ATF2	ENSG00000115966	hypermethylated
chr1_596498_598498	RP5-857K21.3	ENSG00000239664	hypomethylated
chr2_202613853_202615853	AC009960.2	ENSG00000233888	hypomethylated
chr4_158671255_158673255	C4orf46	ENSG00000205208	hypomethylated
chr3_52684917_52686917	PBRM1	ENSG00000163939	hypermethylated
chr20_50189734_50191734	CEBPB	ENSG00000172216	hypermethylated
chr10_81874314_81876314	NRG3	ENSG00000185737	hypermethylated
chr1_235294865_235296865	RPL23AP23	ENSG00000236863	hypermethylated
chr22_41063052_41065052	RP11-12M9.3	ENSG00000237214	hypomethylated
chr10_7532207_7534207	RP11-385N23.1	ENSG00000230121	hypermethylated
chr5_140821193_140823193	AC005609.16	ENSG00000279726	hypermethylated
chr1_181235388_181237388	GM140	ENSG00000179452	hypermethylated
chr4_183418805_183420805	RP11-692E14.1	ENSG00000248376	hypermethylated
chr9_124770310_124772310	NR6A1	ENSG00000148200	hypermethylated
chr6_79630283_79632283	SH3BGRL2	ENSG00000198478	hypermethylated
chr9_41341041_41343041	RP11-187C18.4	ENSG00000276832	hypermethylated
chr1_203399581_203401581	LARP7P1	ENSG00000271588	hypomethylated
chr2_175166709_175168709	MIR933	ENSG00000215973	hypermethylated
chr16_20606107_20608107	ACSM5P1	ENSG00000260762	hypermethylated
chr5_141635870_141637870	HDAC3	ENSG00000171720	hypermethylated
chr5_141635950_141637950	RELL2	ENSG00000164620	hypermethylated
chr6_40345151_40347151	LINC00951	ENSG00000204092	hypomethylated
chr19_43503935_43505935	PHLDB3	ENSG00000176531	hypermethylated
chr15_44955702_44957702	C15orf43	ENSG00000167014	hypomethylated
chr1_40472055_40474055	RP11-656D10.7	ENSG00000279667	hypermethylated
chr17_21572770_21574770	RP11-822E23.4	ENSG00000264245	hypomethylated
chr16_1956606_1958606	RPL3L	ENSG00000140986	hypermethylated
chr5_98772469_98774469	RGMB-AS1	ENSG00000246763	hypermethylated
chr14_53168054_53170054	AL163953.3	ENSG00000237356	hypomethylated
chr2_59732396_59734396	AC007131.2	ENSG00000233891	hypermethylated
chr4_99653648_99655648	RP11-766F14.2	ENSG00000248713	hypomethylated
chr14_90255495_90257495	PSMC1	ENSG00000100764	hypermethylated
chr1_35192148_35194148	SFPQ	ENSG00000116560	hypermethylated
chr20_5470207_5472207	RP5-828H9.1	ENSG00000230563	hypermethylated
chr22_31537589_31539589	RP11-247I13.6	ENSG00000229169	hypermethylated
chr5_132672986_132674986	IL4	ENSG00000113520	hypomethylated
chr1_1274223_1276223	RP5-902P8.10	ENSG00000230415	hypermethylated
chr7_1691450_1693450	AC074389.7	ENSG00000234977	hypermethylated
chr8_79870759_79872759	RP11-26J3.1	ENSG00000249328	hypomethylated
chr20_5470094_5472094	LINC00658	ENSG00000226995	hypermethylated
chr1_113811476_113813476	RSBN1	ENSG00000081019	hypermethylated
chr9_111483745_111485745	KIAA0368	ENSG00000136813	hypermethylated
chr15_101561536_101563536	SNRPCP18	ENSG00000259464	hypermethylated
chr20_20367121_20369121	INSM1	ENSG00000173404	hypermethylated
chr8_69850436_69852436	Metazoa_SRP	ENSG00000277740	hypermethylated
chr2_3518275_3520275	AC142528.1	ENSG00000235078	hypomethylated
chr19_4444978_4446978	MIR4746	ENSG00000266437	hypomethylated
chr14_18625787_18627787	ARHGAP42P5	ENSG00000258233	hypermethylated
chr7_142591928_142593928	TRBV15	ENSG00000276819	hypermethylated
chr17_75666189_75668189	RECQL5	ENSG00000108469	hypomethylated
chr7_57816996_57818996	RP11-548K12.9	ENSG00000250618	hypomethylated
chr7_57817012_57819012	RP11-548K12.3	ENSG00000236907	hypomethylated
chr7_30283307_30285307	ZNRF2	ENSG00000180233	hypermethylated
chr15_59371900_59373900	MYO1E	ENSG00000157483	hypermethylated
chr21_37220419_37222419	AP001432.14	ENSG00000242553	hypermethylated
chr9_20621543_20623543	MLLT3	ENSG00000171843	hypermethylated
chr12_117245164_117247164	TCEB1P32	ENSG00000257465	hypermethylated
chr1_232741715_232743715	RP11-66A2.2	ENSG00000236497	hypermethylated
chr2_203671423_203673423	AC125238.3	ENSG00000233031	hypermethylated
chr1_31703319_31705319	COL16A1	ENSG00000084636	hypomethylated
chr12_116276338_116278338	MED13L	ENSG00000123066	hypermethylated
chr1_40862914_40864914	RP5-1066H13.4	ENSG00000229528	hypomethylated
chr17_21573517_21575517	RP11-822E23.8	ENSG00000272780	hypomethylated
chr16_89158146_89160146	LINC00304	ENSG00000180422	hypomethylated
chr14_73570667_73572667	NT5CP1	ENSG00000258524	hypomethylated
chr3_133398995_133400995	BFSP2	ENSG00000170819	hypomethylated
chr2_100207254_100209254	LINC01104	ENSG00000232084	hypermethylated
chr1_113928192_113930192	HIPK1	ENSG00000163349	hypermethylated
chr1_146376184_146378184	AC245407.1	ENSG00000277573	hypomethylated
chr1_86951923_86953923	AL121989.1	ENSG00000280842	hypermethylated
chr1_217630324_217632324	SPATA17	ENSG00000162814	hypermethylated
chr21_39182851_39184851	PSMG1	ENSG00000183527	hypermethylated
chr2_218269257_218271257	AAMP	ENSG00000127837	hypermethylated
chr16_3879726_3881726	CREBBP	ENSG00000005339	hypermethylated
chr2_27274817_27276817	SLC30A3	ENSG00000115194	hypermethylated
chr21_36484867_36486867	KB-176G8.1	ENSG00000279365	hypomethylated
chr20_32189527_32191527	TSPY26P	ENSG00000235217	hypomethylated
chr14_101024000_101026000	AL132709.2	ENSG00000198982	hypomethylated
chr7_43925411_43927411	URGCP	ENSG00000106608	hypermethylated
chr7_43925438_43927438	UBE2D4	ENSG00000078967	hypermethylated
chr16_89920392_89922392	TUBB3	ENSG00000258947	hypomethylated
chr16_74312337_74314337	AC009120.5	ENSG00000260884	hypermethylated
chr16_74312390_74314390	AC009120.3	ENSG00000239763	hypermethylated
chr14_35121517_35123517	PPP2R3C	ENSG00000092020	hypermethylated
chr14_35121549_35123549	KIAA0391	ENSG00000258790	hypermethylated
chr2_206160841_206162841	snoZ196	ENSG00000281780	hypermethylated
chr2_206160878_206162878	SNORD51	ENSG00000207047	hypermethylated
chr2_206161228_206163228	SNORA41	ENSG00000207406	hypermethylated
chr4_53376643_53378643	FIP1L1	ENSG00000145216	hypermethylated
chr17_17205315_17207315	PLD6	ENSG00000179598	hypermethylated
chr19_42878822_42880822	PSG1	ENSG00000231924	hypomethylated
chr8_144526032_144528032	LRRC24	ENSG00000254402	hypomethylated
chr20_53503314_53505314	RP5-823G15.5	ENSG00000259723	hypomethylated
chr4_118837683_118839683	SEC24D	ENSG00000150961	hypermethylated
chr17_48578947_48580947	MIR10A	ENSG00000274592	hypermethylated
chr1_110674033_110676033	KCNA3	ENSG00000177272	hypermethylated
chr17_81164507_81166507	AATK-AS1	ENSG00000225180	hypermethylated
chr12_120915745_120917745	RPL12P33	ENSG00000244585	hypermethylated
chr15_68253549_68255549	HMGN2P40	ENSG00000260602	hypomethylated
chr7_108002255_108004255	LAMB1	ENSG00000091136	hypermethylated
chr8_142613472_142615472	ARC	ENSG00000198576	hypomethylated
chr16_3031481_3033481	RP11-473M20.5	ENSG00000205890	hypomethylated
chr1_159865954_159867954	RP11-190A12.8	ENSG00000272668	hypomethylated
chr10_102501711_102503711	ACTR1A	ENSG00000138107	hypomethylated
chr17_9643698_9645698	USP43	ENSG00000154914	hypermethylated
chr2_27031910_27033910	TMEM214	ENSG00000119777	hypermethylated
chr4_7067197_7069197	GRPEL1	ENSG00000109519	hypermethylated
chr9_38487338_38489338	GAS2L1P1	ENSG00000229511	hypomethylated
chr19_55116559_55118559	PPP1R12C	ENSG00000125503	hypermethylated
chr16_81068854_81070854	RP11-303E16.6	ENSG00000261838	hypermethylated
chr15_42005132_42007132	CTD-2382E5.2	ENSG00000257797	hypomethylated
chr18_31981899_31983899	RP11-326K13.3	ENSG00000280380	hypermethylated
chr11_123380512_123382512	MIR4493	ENSG00000265357	hypermethylated
chr10_69450473_69452473	TSPAN15	ENSG00000099282	hypomethylated
chr10_14382277_14384277	MIR4293	ENSG00000266321	hypermethylated
chr1_152826473_152828473	LCE1A	ENSG00000186844	hypermethylated
chr21_46154567_46156567	FTCD	ENSG00000160282	hypermethylated
chr14_95318906_95320906	CLMN	ENSG00000165959	hypomethylated
chr6_30131966_30133966	SNORA48	ENSG00000252228	hypermethylated
chr12_125137245_125139245	RP11-158L12.4	ENSG00000279233	hypomethylated
chr8_143367855_143369855	RHPN1	ENSG00000158106	hypomethylated
chr19_3567273_3569273	AC005786.3	ENSG00000266959	hypomethylated
chr22_17066821_17068821	AC006946.16	ENSG00000273203	hypermethylated
chr9_132160676_132162676	NTNG2	ENSG00000196358	hypermethylated
chr17_8209600_8211600	AURKB	ENSG00000178999	hypermethylated
chr15_25864172_25866172	ATP10A	ENSG00000206190	hypomethylated
chr2_91839601_91841601	ABCD1P5	ENSG00000214330	hypermethylated
chr8_81520618_81522618	RP11-257P3.3	ENSG00000253374	hypermethylated
chr22_22117005_22119005	LL22NC03-33B6.4	ENSG00000263366	hypomethylated
chr17_62005016_62007016	RN7SL800P	ENSG00000242398	hypermethylated
chr17_76452351_76454351	AANAT	ENSG00000129673	hypermethylated
chr13_63836456_63838456	OR7E104P	ENSG00000278380	hypomethylated
chr1_45749650_45751650	IPP	ENSG00000197429	hypermethylated
chr19_27805205_27807205	SLC25A1P5	ENSG00000267323	hypomethylated
chr2_216693464_216695464	AC007563.5	ENSG00000236886	hypermethylated
chr19_14474362_14476362	PTGER1	ENSG00000160951	hypomethylated
chr11_86243544_86245544	EED	ENSG00000074266	hypermethylated
chr14_20460612_20462612	TMEM55B	ENSG00000165782	hypermethylated
chr20_4022917_4024917	FTLP3	ENSG00000226608	hypomethylated
chr5_261769_263769	AC021087.1	ENSG00000277812	hypomethylated
chr19_9018344_9020344	BOLA3P2	ENSG00000267332	hypermethylated
chr17_48579111_48581111	HOXB4	ENSG00000182742	hypermethylated
chr3_51952902_51954902	RP11-155D18.13	ENSG00000280422	hypomethylated
chr1_203089654_203091654	ADORA1	ENSG00000163485	hypermethylated
chr12_76877193_76879193	RP11-461F16.3	ENSG00000257910	hypermethylated
chr7_32790814_32792814	SNORA31	ENSG00000251999	hypermethylated
chr21_39444805_39446805	LCA5L	ENSG00000157578	hypermethylated
chr21_39444855_39446855	SH3BGR	ENSG00000185437	hypermethylated
chr1_236482165_236484165	ENO1P1	ENSG00000244457	hypomethylated
chr12_93640586_93642586	RP11-887P2.3	ENSG00000186076	hypomethylated
chr5_72416489_72418489	YBX1P5	ENSG00000251108	hypomethylated
chr19_9182048_9184048	TCEB1P29	ENSG00000267418	hypomethylated
chr1_120175515_120177515	SEC22B	ENSG00000265808	hypomethylated
chr2_28682976_28684976	RNA5SP89	ENSG00000222232	hypomethylated
chr11_63937959_63939959	NAA40	ENSG00000110583	hypomethylated
chr7_66074798_66076798	ASL	ENSG00000126522	hypermethylated
chr16_78048897_78050897	KRT8P22	ENSG00000260731	hypomethylated
chr14_38189983_38191983	CTD-2142D14.1	ENSG00000258649	hypomethylated
chr12_21418594_21420594	SLCO1A2	ENSG00000084453	hypomethylated
chr19_16030307_16032307	LINC00905	ENSG00000167459	hypermethylated
chr15_20004935_20006935	IGHD3OR15-3A	ENSG00000270783	hypomethylated
chr13_102902339_102904339	RP11-255P5.3	ENSG00000278445	hypermethylated
chr8_123043717_123045717	Y_RNA	ENSG00000280598	hypermethylated
chr1_193059080_193061080	UCHL5	ENSG00000116750	hypermethylated
chr9_97237449_97239449	RP11-23J9.5	ENSG00000254876	hypermethylated
chr10_5523009_5525009	CALML3	ENSG00000178363	hypermethylated
chr16_87868488_87870488	SLC7A5	ENSG00000103257	hypomethylated
chr2_232377534_232379534	ALPP	ENSG00000163283	hypermethylated
chr10_13728383_13730383	RP11-353M9.1	ENSG00000234091	hypermethylated
chr3_157162452_157164452	RP11-555M1.3	ENSG00000241770	hypomethylated
chr19_4888298_4890298	AC027319.1	ENSG00000221535	hypermethylated
chr15_20357108_20359108	AC026495.1	ENSG00000265002	hypermethylated
chr15_80692707_80694707	RP11-28H5.2	ENSG00000271983	hypermethylated
chr17_958034_960034	RP11-356I18.1	ENSG00000263017	hypomethylated
chr12_126441481_126443481	RP5-944M2.3	ENSG00000214043	hypomethylated
chr16_20609243_20611243	ACSM3	ENSG00000005187	hypomethylated
chr2_232648849_232650849	RN7SL359P	ENSG00000244384	hypermethylated
chr1_163422164_163424164	RP11-408E1.1	ENSG00000225122	hypomethylated
chr12_120017900_120019900	Metazoa_SRP	ENSG00000278250	hypomethylated
chr6_128579884_128581884	EEF1DP5	ENSG00000213130	hypomethylated
chr10_50589712_50591712	RNU7-107P	ENSG00000238523	hypermethylated
chr22_25198850_25200850	CRYBB3	ENSG00000100053	hypomethylated
chr21_39726755_39728755	AF064860.7	ENSG00000231713	hypermethylated
chr17_7178564_7180564	ASGR1	ENSG00000141505	hypermethylated
chr20_63447051_63449051	RP11-358D14.2	ENSG00000226390	hypermethylated
chr8_8016011_8018011	FAM90A11P	ENSG00000233115	hypomethylated
chr22_32042032_32044032	SLC5A1	ENSG00000100170	hypermethylated
chr12_7694776_7696776	GDF3	ENSG00000184344	hypomethylated
chr20_38325536_38327536	CTD-2308N23.2	ENSG00000206249	hypermethylated
chr11_60984167_60986167	RNU6-933P	ENSG00000207153	hypomethylated
chr14_90380198_90382198	AL512791.1	ENSG00000238758	hypermethylated
chr17_28255669_28257669	CTD-2008P7.7	ENSG00000263788	hypomethylated
chr16_31073320_31075320	ZNF668	ENSG00000167394	hypermethylated
chr11_61791561_61793561	MIR611	ENSG00000207601	hypermethylated
chr16_2459080_2461080	C16orf59	ENSG00000162062	hypermethylated
chr5_10654925_10656925	RP11-54F2.1	ENSG00000251196	hypomethylated
chr12_98514512_98516512	TMPO	ENSG00000120802	hypermethylated
chr13_18807018_18809018	SNX18P26	ENSG00000227568	hypomethylated
chr6_106510855_106512855	AIM1	ENSG00000112297	hypermethylated
chr7_96939364_96941364	RN7SL252P	ENSG00000244318	hypomethylated
chr19_54695604_54697604	LILRP1	ENSG00000186152	hypomethylated
chr4_153639168_153641168	RP11-153M7.3	ENSG00000250771	hypomethylated
chr5_31819638_31821638	RNU6-358P	ENSG00000252373	hypermethylated
chr21_42740758_42742758	AP001627.1	ENSG00000225731	hypomethylated
chr1_156052794_156054794	UBQLN4	ENSG00000160803	hypermethylated
chr1_245369334_245371334	AL359983.1	ENSG00000221165	hypermethylated
chr17_9821071_9823071	RP11-477N12.3	ENSG00000214978	hypomethylated
chr12_37541386_37543386	RP11-125N22.4	ENSG00000257794	hypomethylated
chr10_103451846_103453846	RP11-225H22.4	ENSG00000234699	hypermethylated
chr15_48528728_48530728	CTD-3247H4.2	ENSG00000274654	hypomethylated
chr4_137733977_137735977	RP13-884E18.4	ENSG00000250777	hypomethylated
chr3_22988823_22990823	SALL4P5	ENSG00000231915	hypomethylated
chr11_3028009_3030009	CARS-AS1	ENSG00000247473	hypomethylated
chr10_47321490_47323490	GDF2	ENSG00000263761	hypomethylated
chr1_209651466_209653466	LAMB3	ENSG00000196878	hypermethylated
chr7_1529714_1531714	MAFK	ENSG00000198517	hypomethylated
chr8_144290591_144292591	HSF1	ENSG00000185122	hypermethylated
chr15_59371693_59373693	FAM81A	ENSG00000157470	hypermethylated
chr19_10402538_10404538	MIR1181	ENSG00000221566	hypermethylated
chr13_99452469_99454469	AL583784.1	ENSG00000266207	hypomethylated
chr10_21563577_21565577	RNU6-306P	ENSG00000207347	hypermethylated
chr17_36485629_36487629	ZNHIT3	ENSG00000273611	hypermethylated
chr14_81194040_81196040	AL136040.1	ENSG00000273941	hypomethylated
chr12_34204699_34206699	5S_rRNA	ENSG00000272435	hypomethylated
chr8_90645441_90647441	RP11-68L18.1	ENSG00000246792	hypermethylated
chr7_128696439_128698439	RNA5SP242	ENSG00000201041	hypomethylated
chr8_43312948_43314948	RP11-726G23.12	ENSG00000255497	hypermethylated
chr12_104063183_104065183	GLT8D2	ENSG00000120820	hypermethylated
chr11_67735559_67737559	OR7E11P	ENSG00000254447	hypermethylated
chr21_46285297_46287297	MCM3AP	ENSG00000160294	hypermethylated
chr21_46285337_46287337	YBEY	ENSG00000182362	hypermethylated
chr5_180987845_180989845	BTNL3	ENSG00000168903	hypermethylated
chr11_59712864_59714864	OR10V1	ENSG00000172289	hypomethylated
chr12_50110979_50112979	COX14	ENSG00000178449	hypermethylated
chr11_58059138_58061138	RP11-659P15.1	ENSG00000255146	hypermethylated
chr8_66666217_66668217	VCPIP1	ENSG00000175073	hypermethylated
chr3_36975316_36977316	PRADC1P1	ENSG00000236165	hypermethylated
chr16_22436715_22438715	RRN3P3	ENSG00000257122	hypermethylated
chr16_1772155_1774155	MRPS34	ENSG00000074071	hypermethylated
chr1_228456435_228458435	AL139288.1	ENSG00000281451	hypermethylated
chr12_132985365_132987365	ZNF26	ENSG00000198393	hypermethylated
chr19_22698352_22700352	RPL34P33	ENSG00000241282	hypomethylated
chr3_169662618_169664618	MECOM	ENSG00000085276	hypermethylated
chr1_27661722_27663722	RP11-288L9.1	ENSG00000233975	hypermethylated
chr4_46723408_46725408	RAC1P2	ENSG00000249936	hypomethylated
chr4_9167294_9169294	AC108519.1	ENSG00000264372	hypomethylated
chr17_18604356_18606356	Metazoa_SRP	ENSG00000276532	hypomethylated
chr11_48901181_48903181	RP11-56P9.10	ENSG00000254728	hypomethylated
chr14_22981258_22983258	RP11-298I3.5	ENSG00000259132	hypermethylated
chr12_117189531_117191531	FBXO21	ENSG00000135108	hypomethylated
chr11_125873528_125875528	RP11-680F20.10	ENSG00000260209	hypomethylated
chr9_137252497_137254497	C9orf173-AS1	ENSG00000275549	hypermethylated
chr9_17133982_17135982	CNTLN	ENSG00000044459	hypermethylated
chr20_45748920_45750920	SPINT5P	ENSG00000168630	hypermethylated
chr15_43691886_43693886	CKMT1A	ENSG00000223572	hypermethylated
chr5_138212343_138214343	CDC23	ENSG00000094880	hypomethylated
chr18_11993938_11995938	RP11-820I16.3	ENSG00000266955	hypomethylated
chr5_133255492_133257492	CTB-49A3.4	ENSG00000250244	hypermethylated
chr14_46650821_46652821	RPL10L	ENSG00000165496	hypomethylated
chr15_80561944_80563944	RP11-379K22.2	ENSG00000259175	hypermethylated
chr8_23482534_23484534	CTC-756D1.1	ENSG00000253483	hypomethylated
chr11_64283704_64285704	BAD	ENSG00000002330	hypermethylated
chr20_25225735_25227735	RP4-738P15.6	ENSG00000279322	hypomethylated
chr20_50152637_50154637	TMEM189-UBE2V1	ENSG00000124208	hypomethylated
chr12_56510002_56512002	RP11-153M3.1	ENSG00000257576	hypomethylated
chr15_89713232_89715232	RNU6-132P	ENSG00000206590	hypermethylated
chr19_1569860_1571860	RN7SL477P	ENSG00000239367	hypomethylated
chr7_64861999_64863999	EEF1DP4	ENSG00000213640	hypomethylated
chr22_20772879_20774879	SERPIND1	ENSG00000099937	hypermethylated
chr18_76821295_76823295	RP11-162A12.2	ENSG00000264278	hypermethylated
chr3_32036526_32038526	SNORA25	ENSG00000201701	hypermethylated
chr22_50737139_50739139	AC000036.4	ENSG00000225929	hypomethylated
chr10_70601775_70603775	PRF1	ENSG00000180644	hypomethylated
chr2_113057638_113059638	IL36RN	ENSG00000136695	hypomethylated
chr11_3275045_3277045	NDUFA5P8	ENSG00000236987	hypermethylated
chr1_1166092_1168092	MIR200B	ENSG00000207730	hypermethylated
chr19_55369463_55371463	IL11	ENSG00000095752	hypomethylated
chr16_85582571_85584571	RP11-118F19.1	ENSG00000270124	hypomethylated
chr15_39018233_39020233	RP11-62C7.2	ENSG00000259278	hypermethylated
chr17_75393123_75395123	RP11-16C1.1	ENSG00000265342	hypomethylated
chr10_51525341_51527341	AL157399.1	ENSG00000278260	hypermethylated
chr1_77758852_77760852	USP33	ENSG00000077254	hypermethylated
chr9_40882634_40884634	RP11-318K12.3	ENSG00000276868	hypomethylated
chr16_31073422_31075422	ZNF646	ENSG00000167395	hypermethylated
chr12_42432357_42434357	RP11-328C8.2	ENSG00000257376	hypomethylated
chr2_38137946_38139946	AC009229.6	ENSG00000229160	hypomethylated
chr1_218540899_218542899	U3	ENSG00000212610	hypermethylated
chr10_133430318_133432318	OR6L2P	ENSG00000273327	hypomethylated
chr18_61893247_61895247	RNF152	ENSG00000176641	hypermethylated
chr10_68845805_68847805	RNU6-697P	ENSG00000200218	hypermethylated
chr14_104923816_104925816	PLD4	ENSG00000166428	hypomethylated
chr14_100678884_100680884	RP11-566J3.2	ENSG00000258717	hypomethylated
chr20_33912336_33914336	TPM3P2	ENSG00000214200	hypermethylated
chr6_43228484_43230484	DNPH1	ENSG00000112667	hypermethylated
chr16_32187333_32189333	RP11-17M15.1	ENSG00000260847	hypomethylated
chr19_7039179_7041179	MBD3L4	ENSG00000205718	hypomethylated
chr19_31965969_31967969	CTC-360P9.2	ENSG00000267684	hypomethylated
chr7_107742697_107744697	CBLL1	ENSG00000105879	hypermethylated
chr15_96441313_96443313	PGAM1P12	ENSG00000250825	hypomethylated
chr19_28891931_28893931	AC008991.1	ENSG00000267683	hypomethylated
chr19_57190500_57192500	ZNF264	ENSG00000083844	hypermethylated
chr3_37968404_37970404	MIR26A1	ENSG00000199075	hypermethylated
chr7_36817959_36819959	NPM1P18	ENSG00000225739	hypermethylated
chr18_68426030_68428030	RP11-128D14.1	ENSG00000265425	hypermethylated
chr2_100469482_100471482	NMS	ENSG00000204640	hypermethylated
chr1_178541752_178543752	C1orf220	ENSG00000213057	hypomethylated
chr18_23893206_23895206	AC010754.1	ENSG00000221389	hypomethylated
chr10_90870716_90872716	RPP30	ENSG00000148688	hypermethylated
chr9_67717821_67719821	RP11-12A20.10	ENSG00000278735	hypomethylated
chr16_22373859_22375859	RP11-21M24.2	ENSG00000260790	hypermethylated
chr1_158765682_158767682	OR6N1	ENSG00000197403	hypermethylated
chr2_39123345_39125345	SOS1	ENSG00000115904	hypomethylated
chr2_237014305_237016305	RNU6-1051P	ENSG00000202341	hypomethylated
chr6_99992944_99994944	MCHR2-AS1	ENSG00000229315	hypomethylated
chr8_117519713_117521713	MED30	ENSG00000164758	hypomethylated
chr17_11156455_11158455	RN7SL601P	ENSG00000243346	hypermethylated
chr14_52729180_52731180	STYX	ENSG00000198252	hypermethylated
chr18_77621552_77623552	RP11-63N3.1	ENSG00000264693	hypomethylated
chr11_65088324_65090324	VPS51	ENSG00000149823	hypomethylated
chr19_12890026_12892026	GCDH	ENSG00000105607	hypomethylated
chr4_8591660_8593660	CPZ	ENSG00000109625	hypermethylated
chr12_52776345_52778345	KRT76	ENSG00000185069	hypermethylated
chr1_94120132_94122132	ABCA4	ENSG00000198691	hypomethylated
chr16_2234816_2236816	DNASE1L2	ENSG00000167968	hypomethylated
chr22_32198919_32200919	IGLCOR22-1	ENSG00000254127	hypomethylated
chr9_83706594_83708594	RP11-522I20.3	ENSG00000254473	hypermethylated
chr9_35645270_35647270	RP11-331F9.4	ENSG00000227933	hypomethylated
chr4_52711404_52713404	DANCR	ENSG00000226950	hypomethylated
chr4_52711682_52713682	MIR4449	ENSG00000264585	hypomethylated
chr16_84041636_84043636	SLC38A8	ENSG00000166558	hypomethylated
chr17_16426474_16428474	AC093484.4	ENSG00000239203	hypomethylated
chr1_109041113_109043113	WDR47	ENSG00000085433	hypermethylated
chr12_14191002_14193002	RP11-298E10.1	ENSG00000227760	hypermethylated
chr6_34791015_34793015	UHRF1BP1	ENSG00000065060	hypermethylated
chr15_25246345_25248345	SNORD115-42	ENSG00000201143	hypermethylated
chr16_30820338_30822338	RP11-2C24.7	ENSG00000274678	hypomethylated
chr12_123960244_123962244	RP11-214K3.23	ENSG00000270130	hypermethylated
chr5_114359945_114361945	KCNN2	ENSG00000080709	hypermethylated
chr17_81261920_81263920	RP11-455O6.5	ENSG00000279187	hypermethylated
chr15_91031435_91033435	AC068831.12	ENSG00000258665	hypomethylated
chr7_16420322_16422322	ISPD	ENSG00000214960	hypermethylated
chr19_58048346_58050346	HNRNPDLP4	ENSG00000270837	hypomethylated
chr11_23729588_23731588	RP11-945A11.1	ENSG00000255193	hypomethylated
chr6_16760138_16762138	RP1-151F17.1	ENSG00000229931	hypermethylated
chr11_71602353_71604353	KRTAP5-11	ENSG00000204571	hypomethylated
chr19_18373731_18375731	GDF15	ENSG00000130513	hypomethylated
chr7_100271218_100273218	GATS	ENSG00000239521	hypermethylated
chr5_56296689_56298689	RNU6ATAC2P	ENSG00000210678	hypomethylated
chr6_43242680_43244680	TTBK1	ENSG00000146216	hypomethylated
chr4_5050442_5052442	STK32B	ENSG00000152953	hypermethylated
chr2_94586183_94588183	RP11-407P15.1	ENSG00000261522	hypomethylated
chr10_133069929_133071929	GPR123	ENSG00000197177	hypomethylated
chr3_197673576_197675576	MIR922	ENSG00000216042	hypomethylated
chr17_17590708_17592708	PEMT	ENSG00000133027	hypermethylated
chr11_66392449_66394449	RNU1-84P	ENSG00000202317	hypomethylated
chr5_84383427_84385427	CTD-2269F5.1	ENSG00000250320	hypermethylated
chr12_56635816_56637816	BAZ2A	ENSG00000076108	hypermethylated
chr9_121202159_121204159	RN7SL181P	ENSG00000243738	hypermethylated
chr4_1985477_1987477	MIR943	ENSG00000216105	hypomethylated
chr1_11846442_11848442	NPPA-AS1_3	ENSG00000275915	hypomethylated
chr12_32099735_32101735	RP11-843B15.3	ENSG00000271357	hypomethylated
chr7_151023499_151025499	ATG9B	ENSG00000181652	hypermethylated
chr12_122062306_122064306	AC156455.1	ENSG00000256546	hypomethylated
chr3_32189747_32191747	AC097639.8	ENSG00000237433	hypomethylated
chr17_15703900_15705900	UBE2SP1	ENSG00000233966	hypermethylated
chr18_70383591_70385591	RP11-41O4.2	ENSG00000266278	hypermethylated
chr6_53207697_53209697	RP1-34L19.1	ENSG00000218713	hypomethylated
chr7_104940063_104942063	RP11-325F22.2	ENSG00000237513	hypermethylated
chr16_46648126_46650126	RP11-93O14.1	ENSG00000260909	hypomethylated
chr4_8021665_8023665	RP11-338K13.1	ENSG00000273267	hypomethylated
chr1_169793966_169795966	METTL18	ENSG00000171806	hypermethylated
chr16_69333871_69335871	RP11-343C2.12	ENSG00000272617	hypomethylated
chr15_74298503_74300503	RP11-60L3.3	ENSG00000280309	hypomethylated
chr11_77734026_77736026	FTH1P16	ENSG00000227376	hypermethylated
chr15_52123561_52125561	CTD-2184D3.7	ENSG00000259709	hypomethylated
chr9_19048354_19050354	FAM154A	ENSG00000155875	hypermethylated
chr9_19048395_19050395	RRAGA	ENSG00000155876	hypermethylated
chr21_26965513_26967513	ADAMTS5	ENSG00000154736	hypomethylated
chr3_98592723_98594723	CPOX	ENSG00000080819	hypomethylated
chr4_138923232_138925232	RP11-577B7.1	ENSG00000250577	hypermethylated
chr8_21918671_21920671	XPO7	ENSG00000130227	hypomethylated
chr2_219596860_219598860	STK11IP	ENSG00000144589	hypermethylated
chr10_58268058_58270058	CISD1	ENSG00000122873	hypermethylated
chr16_52941139_52943139	RP11-467J12.2	ENSG00000260258	hypermethylated
chr18_58861600_58863600	ZNF532	ENSG00000074657	hypermethylated
chr9_42973855_42975855	GXYLT1P5	ENSG00000276591	hypermethylated
chr11_47351702_47353702	MYBPC3	ENSG00000134571	hypomethylated
chr17_5281265_5283265	RABEP1	ENSG00000029725	hypermethylated
chr2_199910159_199912159	AC073043.1	ENSG00000232732	hypermethylated
chr2_199910256_199912256	C2orf69	ENSG00000178074	hypermethylated
chr7_134985508_134987508	AGBL3	ENSG00000146856	hypermethylated
chr12_53053438_53055438	RP11-983P16.4	ENSG00000257337	hypomethylated
chr18_7737225_7739225	AP000897.1	ENSG00000221631	hypomethylated
chr1_228273397_228275397	RP5-1139B12.2	ENSG00000269890	hypomethylated
chr10_79840358_79842358	NUTM2E	ENSG00000228570	hypomethylated
chr12_132328349_132330349	GALNT9	ENSG00000182870	hypermethylated
chr12_50166533_50168533	CERS5	ENSG00000139624	hypomethylated
chr1_149699296_149701296	U1	ENSG00000275229	hypomethylated
chr7_142510626_142512626	TRBV7-7	ENSG00000253291	hypomethylated
chr1_19273194_19275194	AKR7L	ENSG00000211454	hypermethylated
chr1_7852512_7854512	UTS2	ENSG00000049247	hypermethylated
chr4_145148649_145150649	Y_RNA	ENSG00000238713	hypomethylated
chr4_151760023_151762023	GATB	ENSG00000059691	hypermethylated
chr9_98795965_98797965	ANKS6	ENSG00000165138	hypermethylated
chr22_50754434_50756434	AC002056.3	ENSG00000213683	hypermethylated
chr5_156923119_156925119	APOOP1	ENSG00000270560	hypermethylated
chr10_38401916_38403916	SEPT7P9	ENSG00000120555	hypermethylated
chr4_183986678_183988678	RP11-739P1.2	ENSG00000248206	hypomethylated
chr11_13961689_13963689	SPON1	ENSG00000262655	hypermethylated
chr11_56014957_56016957	OR5F2P	ENSG00000182365	hypermethylated
chr22_21641261_21643261	SDF2L1	ENSG00000128228	hypomethylated
chr1_16236162_16238162	RSG1	ENSG00000132881	hypomethylated
chr6_53218261_53220261	RNU1-136P	ENSG00000206908	hypomethylated
chr2_228683580_228685580	AC074019.1	ENSG00000228226	hypermethylated
chr11_1990096_1992096	LINC01219	ENSG00000232987	hypermethylated
chr16_35506170_35508170	RP11-80F22.2	ENSG00000269622	hypomethylated
chr6_26232122_26234122	HIST1H2APS3	ENSG00000218281	hypomethylated
chr12_131644918_131646918	RP11-495K9.8	ENSG00000279153	hypomethylated
chr7_65507944_65509944	RP11-328P23.3	ENSG00000226767	hypomethylated
chr14_75268283_75270283	RP11-293M10.1	ENSG00000258740	hypermethylated
chr3_127535812_127537812	LINC01471	ENSG00000239921	hypermethylated
chr14_104977357_104979357	AHNAK2	ENSG00000185567	hypomethylated
chr12_53953834_53955834	HOXC12	ENSG00000123407	hypermethylated
chr9_61857710_61859710	RP11-374M1.11	ENSG00000277624	hypomethylated
chr8_39901275_39903275	IDO1	ENSG00000131203	hypermethylated
chr17_37051775_37053775	CTC-268N12.2	ENSG00000278638	hypermethylated
chr17_28847860_28849860	RP11-20B24.3	ENSG00000264138	hypomethylated
chr16_22813177_22815177	HS3ST2	ENSG00000122254	hypomethylated
chr9_20683688_20685688	FOCAD-AS1	ENSG00000227071	hypermethylated
chr1_243254348_243256348	CEP170	ENSG00000143702	hypermethylated
chr11_30585872_30587872	MPPED2	ENSG00000066382	hypermethylated
chr19_48871392_48873392	PPP1R15A	ENSG00000087074	hypomethylated
chr12_121803180_121805180	SETD1B	ENSG00000139718	hypermethylated
chr15_41836775_41838775	PLA2G4B	ENSG00000243708	hypomethylated
chr11_74945078_74947078	AP001992.1	ENSG00000265344	hypomethylated
chr8_30726926_30728926	GSR	ENSG00000104687	hypomethylated
chr15_30222017_30224017	RP11-261B23.1	ENSG00000259993	hypomethylated
chr3_109647107_109649107	RP11-457K10.1	ENSG00000242029	hypomethylated
chr21_32611866_32613866	C21orf59	ENSG00000159079	hypermethylated
chr16_22436165_22438165	CDR2	ENSG00000140743	hypermethylated
chr10_29544097_29546097	MIR604	ENSG00000207612	hypomethylated
chr1_25905454_25907454	MIR3917	ENSG00000264021	hypermethylated
chr11_133864627_133866627	RP11-259P6.3	ENSG00000213153	hypomethylated
chr2_157298158_157300158	RN7SKP281	ENSG00000222404	hypomethylated
chr1_91599171_91601171	RP11-91I11.1	ENSG00000229067	hypomethylated
chr20_41617494_41619494	CHD6	ENSG00000124177	hypermethylated
chr2_134917235_134919235	CCNT2	ENSG00000082258	hypermethylated
chr12_118371945_118373945	TAOK3	ENSG00000135090	hypermethylated
chr4_120066074_120068074	MAD2L1	ENSG00000164109	hypermethylated
chr3_44623797_44625797	ZNF197-AS1	ENSG00000233509	hypermethylated
chr5_79935579_79937579	LINC01455	ENSG00000250888	hypomethylated
chr15_89885591_89887591	RNU6-1111P	ENSG00000212420	hypermethylated
chr19_16639668_16641668	CTC-429P9.5	ENSG00000267904	hypomethylated
chr10_87503875_87505875	MINPP1	ENSG00000107789	hypermethylated
chr21_9324013_9326013	bP-21264C1.2	ENSG00000278932	hypermethylated
chr11_108497432_108499432	KDELC2	ENSG00000178202	hypermethylated
chr1_114534995_114536995	PKMP1	ENSG00000236480	hypomethylated
chr15_40809373_40811373	AC012476.1	ENSG00000276198	hypermethylated
chr5_96524267_96526267	CAST	ENSG00000153113	hypermethylated
chr7_44795680_44797680	PPIA	ENSG00000196262	hypermethylated
chr15_28883483_28885483	APBA2	ENSG00000034053	hypermethylated
chr2_215435172_215437172	FN1	ENSG00000115414	hypermethylated
chr3_12849659_12851659	AC034198.7	ENSG00000250939	hypermethylated
chr19_19231855_19233855	RNU6-1028P	ENSG00000252973	hypermethylated
chr5_157344721_157346721	FNDC9	ENSG00000172568	hypomethylated
chr21_37072170_37074170	PIGP	ENSG00000185808	hypermethylated
chr13_22850773_22852773	RP11-363G2.4	ENSG00000229556	hypomethylated
chr15_25864295_25866295	RP11-2C7.1	ENSG00000259011	hypomethylated
chr10_119596029_119598029	TIAL1	ENSG00000151923	hypomethylated
chr15_89086459_89088459	ABHD2	ENSG00000140526	hypomethylated
chr7_64665083_64667083	ZNF107	ENSG00000196247	hypermethylated
chr5_122477662_122479662	AC022101.1	ENSG00000277169	hypomethylated
chr5_140646058_140648058	IK	ENSG00000113141	hypermethylated
chr1_6612685_6614685	PHF13	ENSG00000116273	hypermethylated
chr20_45846940_45848940	Metazoa_SRP	ENSG00000277051	hypomethylated
chr7_142932808_142934808	TRPV5	ENSG00000127412	hypermethylated
chr1_33079996_33081996	AK2	ENSG00000004455	hypomethylated
chr3_75368346_75370346	AC139453.1	ENSG00000266685	hypomethylated
chr6_57221314_57223314	RAB23	ENSG00000112210	hypermethylated
chr10_89413557_89415557	LIPA	ENSG00000107798	hypermethylated
chr10_89413586_89415586	IFIT5	ENSG00000152778	hypermethylated
chr22_29110683_29112683	CTA-747E2.10	ENSG00000226772	hypermethylated
chr3_109363234_109365234	RP11-397K18.1	ENSG00000241257	hypermethylated
chr22_50205062_50207062	RP3-402G11.27	ENSG00000272836	hypomethylated
chr6_160925369_160927369	RP11-235G24.3	ENSG00000233342	hypomethylated
chr14_73536114_73538114	ACOT1	ENSG00000184227	hypomethylated
chr1_235518971_235520971	RP4-534P7.2	ENSG00000238236	hypomethylated
chr3_100645121_100647121	SNORA31	ENSG00000252989	hypermethylated
chr1_7693844_7695844	RP11-338N10.1	ENSG00000270171	hypomethylated
chr1_30414825_30416825	RP4-591L5.2	ENSG00000231949	hypomethylated
chr5_1858890_1860890	CTD-2194D22.5	ENSG00000279222	hypomethylated
chr15_42939358_42941358	FDPSP4	ENSG00000254793	hypomethylated
chr18_75070091_75072091	RP11-405M12.3	ENSG00000278607	hypomethylated
chr18_22932764_22934764	RP11-739L10.1	ENSG00000265943	hypermethylated
chr20_45305851_45307851	RBPJL	ENSG00000124232	hypermethylated
chr16_10528440_10530440	RP11-27M24.1	ENSG00000256013	hypermethylated
chr1_113811379_113813379	RP5-1073O3.2	ENSG00000231128	hypermethylated
chr19_7029577_7031577	MBD3L5	ENSG00000237247	hypomethylated
chr18_36188824_36190824	RP11-49I11.4	ENSG00000274849	hypermethylated
chr19_51001711_51003711	KLK8	ENSG00000129455	hypomethylated
chr9_121493519_121495519	RN7SL187P	ENSG00000240299	hypermethylated
chr1_1670990_1672990	RP11-345P4.7	ENSG00000269737	hypomethylated
chr5_2787549_2789549	RP11-692C23.1	ENSG00000249541	hypermethylated
chr20_35614892_35616892	SPAG4	ENSG00000061656	hypermethylated
chr9_137053045_137055045	ENTPD2	ENSG00000054179	hypermethylated
chr1_232897914_232899914	AL122003.1	ENSG00000273857	hypermethylated
chr16_49707006_49709006	MRPS21P7	ENSG00000260024	hypomethylated
chr3_57225521_57227521	HESX1	ENSG00000163666	hypomethylated
chr12_111404948_111406948	SH2B3	ENSG00000111252	hypermethylated
chr14_64784686_64786686	MIR7855	ENSG00000277239	hypomethylated
chr22_18526802_18528802	TMEM191B	ENSG00000278558	hypermethylated
chr9_136843415_136845415	C9orf172	ENSG00000232434	hypomethylated
chr17_61381785_61383785	RP11-332H18.3	ENSG00000266934	hypomethylated
chr2_130128222_130130222	POTEF	ENSG00000196604	hypomethylated
chr1_212625771_212627771	RP11-338C15.5	ENSG00000235862	hypomethylated
chr8_101396933_101398933	RN7SL563P	ENSG00000239211	hypermethylated
chr9_33166356_33168356	B4GALT1	ENSG00000086062	hypermethylated
chr19_55244250_55246250	MIR6803	ENSG00000278264	hypomethylated
chr10_58266934_58268934	IPMK	ENSG00000151151	hypermethylated
chr21_42495008_42497008	SLC37A1	ENSG00000160190	hypomethylated
chr15_21011589_21013589	IGHD3OR15-3B	ENSG00000271255	hypomethylated
chr22_20069569_20071569	AC006547.13	ENSG00000236540	hypomethylated
chr19_6572057_6574057	Y_RNA	ENSG00000199223	hypermethylated
chr17_32150504_32152504	ARGFXP2	ENSG00000265293	hypermethylated
chr12_21436615_21438615	PYROXD1	ENSG00000121350	hypermethylated
chr16_14924937_14926937	MIR6511A2	ENSG00000275259	hypomethylated
chr5_160071268_160073268	U6	ENSG00000280834	hypomethylated
chr16_56588074_56590074	MT3	ENSG00000087250	hypomethylated
chr18_50966991_50968991	ELAC1	ENSG00000141642	hypomethylated
chr18_50967019_50969019	RP11-729L2.2	ENSG00000267699	hypomethylated
chr14_22517812_22519812	TRAJ25	ENSG00000211864	hypermethylated
chr6_80105647_80107647	BCKDHB	ENSG00000083123	hypermethylated
chr21_6896291_6898291	CH507-210P18.3	ENSG00000280172	hypomethylated
chr17_10420950_10422950	MYH8	ENSG00000133020	hypermethylated
chr19_41061444_41063444	CYP2G2P	ENSG00000268101	hypomethylated
chr16_83507346_83509346	MIR3182	ENSG00000263785	hypomethylated
chr12_94139077_94141077	RP11-74K11.1	ENSG00000257360	hypomethylated
chr3_12510213_12512213	RNA5SP123	ENSG00000200114	hypermethylated
chr14_65278267_65280267	PTBP1P	ENSG00000259078	hypermethylated
chr6_26215692_26217692	HIST1H2BG	ENSG00000273802	hypermethylated
chr7_99324898_99326898	ARPC1A	ENSG00000241685	hypermethylated
chr7_152589941_152591941	AC104843.4	ENSG00000231139	hypomethylated
chr2_36354926_36356926	CRIM1	ENSG00000150938	hypermethylated
chr22_46057160_46059160	RP6-109B7.2	ENSG00000231010	hypermethylated
chr10_103192306_103194306	NT5C2	ENSG00000076685	hypermethylated
chr1_206036231_206038231	C1orf186	ENSG00000263961	hypermethylated
chr11_65454258_65456258	CMB9-22P13.1	ENSG00000173727	hypermethylated
chr16_18335736_18337736	NPIPA8	ENSG00000214940	hypermethylated
chr11_73786316_73788316	MRPL48	ENSG00000175581	hypermethylated
chr8_10546585_10548585	PRSS51	ENSG00000253649	hypomethylated
chr19_32404543_32406543	DPY19L3	ENSG00000178904	hypermethylated
chr19_32404560_32406560	AC007773.2	ENSG00000267213	hypermethylated
chr4_2461220_2463220	RNF4	ENSG00000063978	hypomethylated
chr3_27721711_27723711	EOMES	ENSG00000163508	hypermethylated
chr7_5044821_5046821	RBAK	ENSG00000146587	hypermethylated
chr2_25420117_25422117	AC104699.1	ENSG00000224220	hypermethylated
chr15_58759681_58761681	U3	ENSG00000200318	hypermethylated
chr14_100290117_100292117	RP11-638I2.6	ENSG00000258504	hypomethylated
chr19_8820501_8822501	CTD-2529P6.3	ENSG00000269300	hypomethylated
chr20_31604283_31606283	ID1	ENSG00000125968	hypomethylated
chr7_73769270_73771270	CLDN3	ENSG00000165215	hypomethylated
chr9_97697922_97699922	KRT18P13	ENSG00000214417	hypomethylated
chr15_64840883_64842883	AC069368.3	ENSG00000249240	hypermethylated
chr22_38704723_38706723	GTPBP1	ENSG00000100226	hypomethylated
chr3_125733295_125735295	OR7E53P	ENSG00000239978	hypermethylated
chr2_113888750_113890750	RP11-141B14.1	ENSG00000270019	hypermethylated
chr2_113888960_113890960	ACTR3	ENSG00000115091	hypermethylated
chr11_62573086_62575086	EEF1G	ENSG00000254772	hypomethylated
chr19_10516931_10518931	S1PR5	ENSG00000180739	hypomethylated
chr2_130128621_130130621	MED15P9	ENSG00000223760	hypomethylated
chr1_18955686_18957686	IFFO2	ENSG00000169991	hypermethylated
chr5_4865221_4867221	RP11-445O3.2	ENSG00000248973	hypomethylated
chr19_49817279_49819279	MED25	ENSG00000104973	hypermethylated
chr12_50939026_50941026	Y_RNA	ENSG00000199740	hypermethylated
chr15_28456783_28458783	RP11-483E23.4	ENSG00000260159	hypomethylated
chr13_32314344_32316344	ZAR1L	ENSG00000189167	hypomethylated
chr13_32314474_32316474	BRCA2	ENSG00000139618	hypomethylated
chr12_70242360_70244360	RP11-611E13.2	ENSG00000257815	hypermethylated
chr16_88662161_88664161	MVD	ENSG00000167508	hypermethylated
chr17_56960054_56962054	COIL	ENSG00000121058	hypomethylated
chr1_153626926_153628926	S100A1	ENSG00000160678	hypomethylated
chr14_100880007_100882007	MIR431	ENSG00000208001	hypomethylated
chr19_7829233_7831233	EVI5L	ENSG00000142459	hypomethylated
chr5_177907465_177909465	AC106795.1	ENSG00000221204	hypermethylated
chr5_140854883_140856883	PCDHA10	ENSG00000250120	hypomethylated
chr17_351638_353638	RP11-1260E13.2	ENSG00000262294	hypermethylated
chr10_95068497_95070497	CYP2C8	ENSG00000138115	hypomethylated
chr16_85935223_85937223	RP11-542M13.3	ENSG00000268804	hypomethylated
[truncated: 799 more rows]
